# Supplementary material
Source: MDPI journal article supplement (https://www.mdpi.com/1424-2818/15/2/304)
Supplement: s1 [file s1]

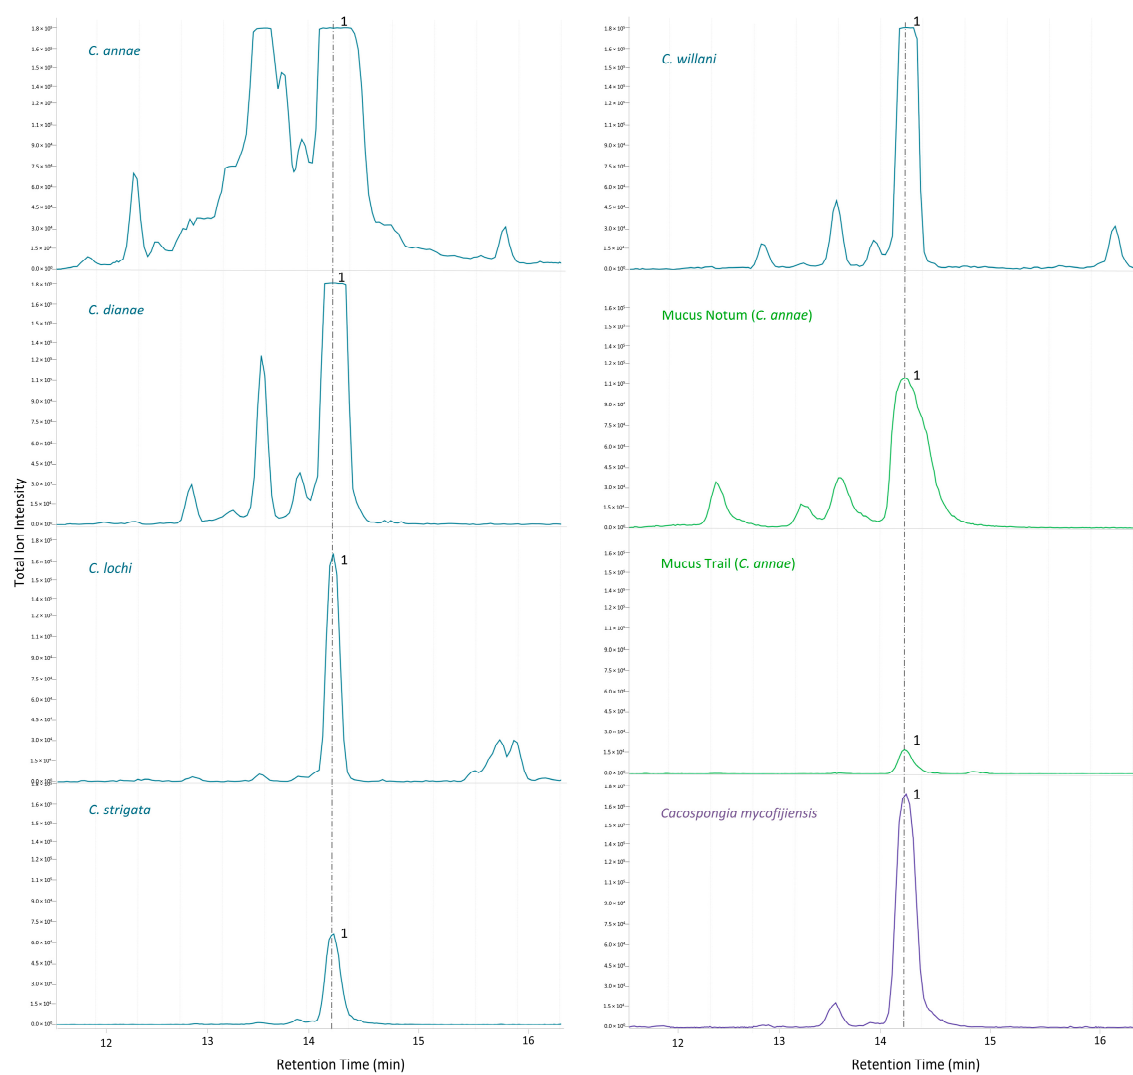

**Figure S1.** Comparison of HPLC-MS chromatograms of the investigated *Chromodoris* species, mucus collected from the back (notum) and the trail of *C. annae*, and the associated sponge *Cacospongia mycofijiensis*, showing the presence of LatA (1) in all samples.

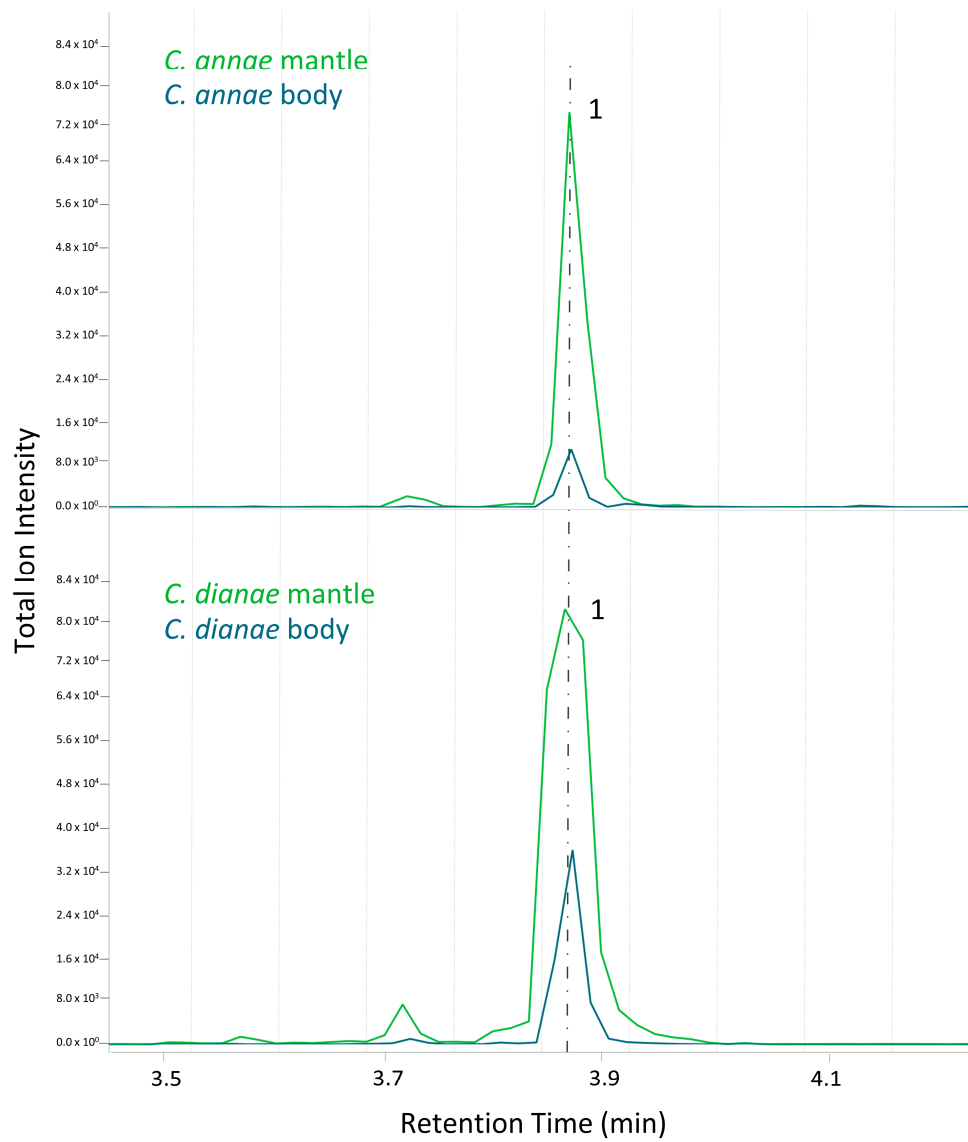

**Figure S2.** Comparison of superimposed HPLC–MS chromatograms of *C. annae* and *C. diana* mantle rim and body extracts, showing a high abundance of LatA (1) in the mantle rim.

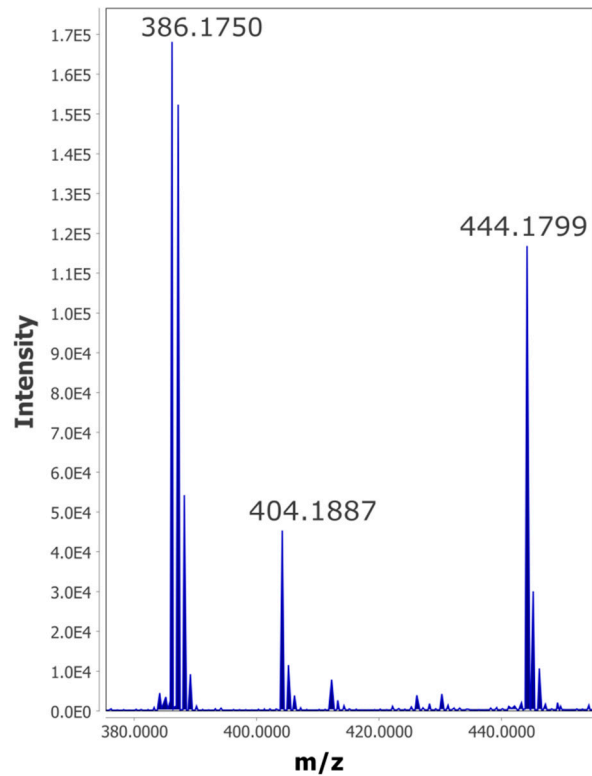

**Figure S3.** Exemplary mass spectrum from the chromatographic peaks marked as (1) in Figure S1 and Figure S2 showing characteristic protonated ion fragments and adducts for latrunculin A ( $m/z$  386  $[M + H - 2H_2O]^+$ , 404  $[M + H - H_2O]^+$  and 444  $[M + Na]^+$ ). Spectra were obtained in positive ion mode.

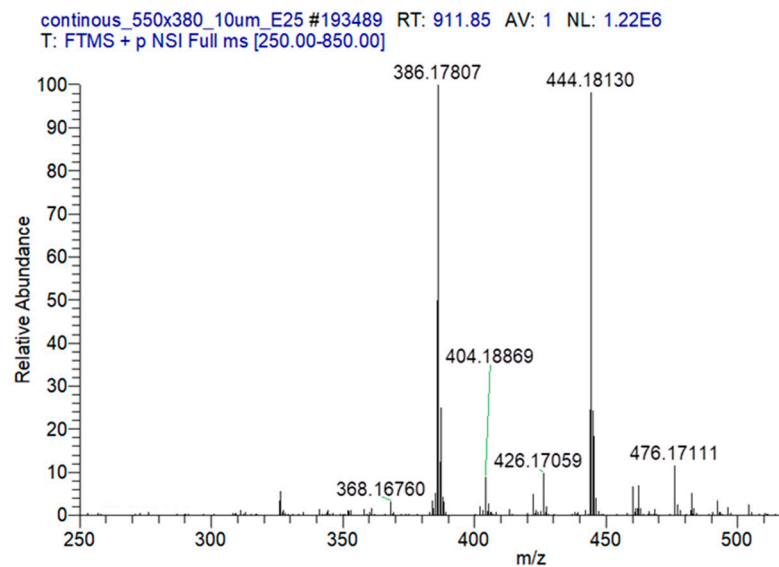

**Figure S4.** Single-pixel (10  $\mu m$ ) mass spectrum of the MALDI MSI from one of the *Chromodoris* MDF-vacuoles, showing protonated ion fragments and adducts typical for LatA ( $m/z$  386  $[M + H - 2H_2O]^+$  and 444  $[M + Na]^+$ ) as main signals.

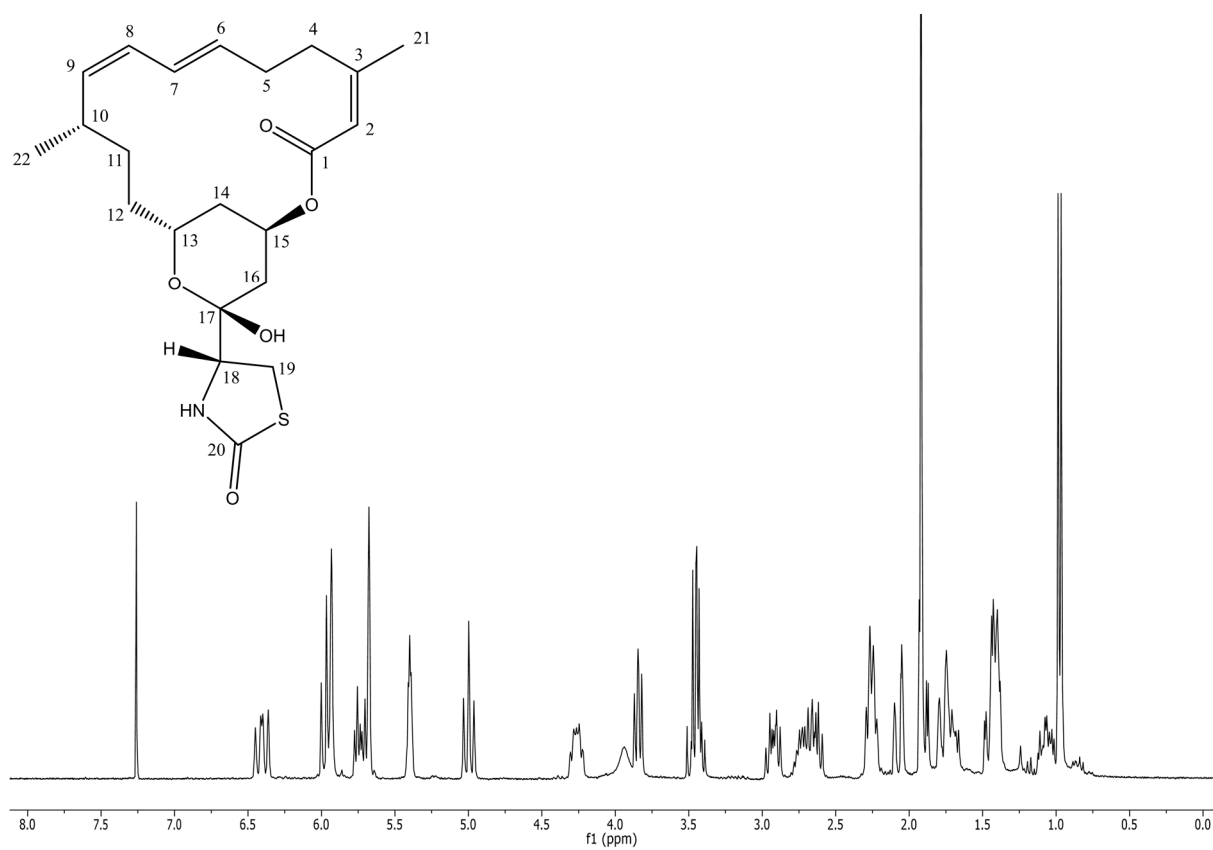

**Figure S5.**  $^1\text{H}$ -NMR spectrum of latrunculin A in CDCl<sub>3</sub>.

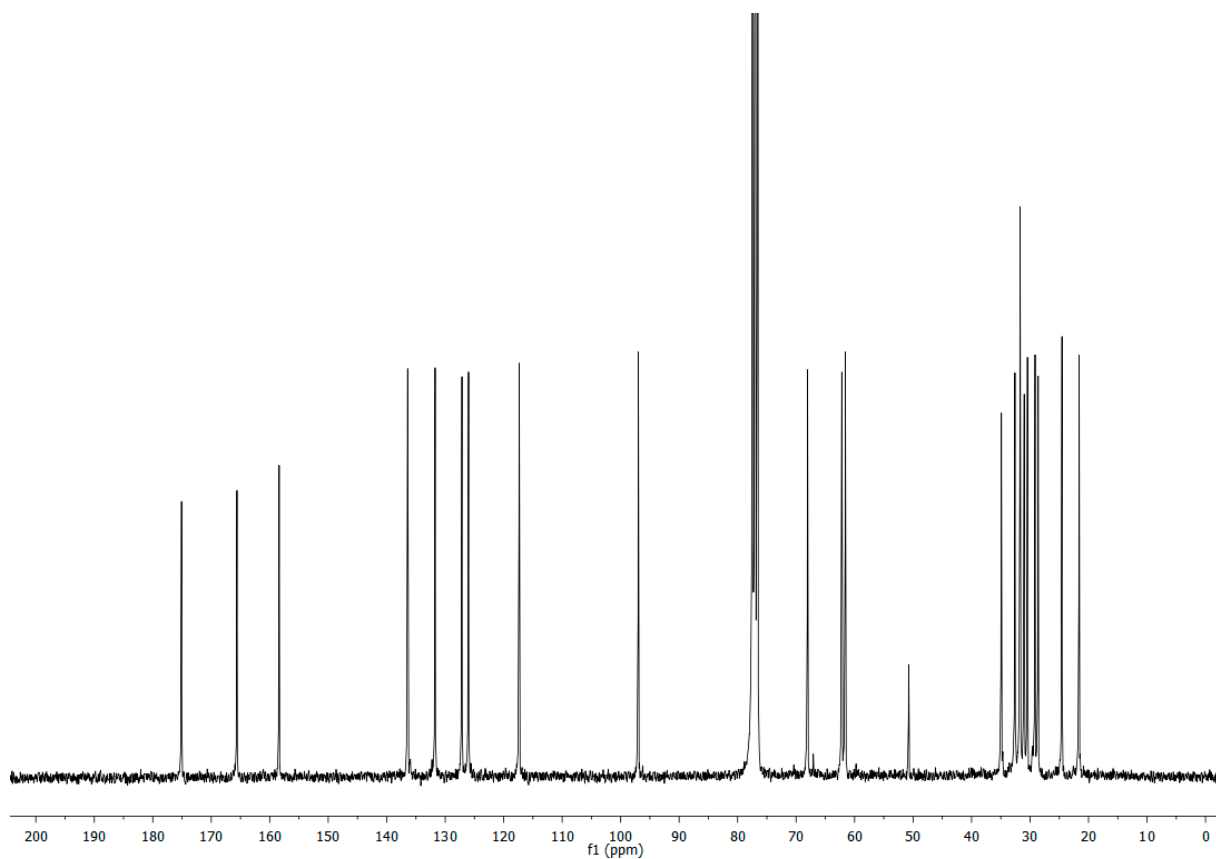

**Figure S6.**  $^{13}\text{C}$ -NMR spectrum of latrunculin A in CDCl<sub>3</sub>.

**Table S1.** A comparison of the <sup>1</sup>H-NMR Data reported for latrunculin A.

| C    | Experimental Data<br>(MeOD) δ <sub>H</sub> | Experimental Data<br>(CDCl <sub>3</sub> ) δ <sub>H</sub> | Kashman et al.<br>1980 [46]<br>(CDCl <sub>3</sub> ) δ <sub>H</sub> | Groweiss et al.,<br>1983 [112]<br>(CDCl <sub>3</sub> ) δ <sub>H</sub> | Smith et al.<br>1992 [48]<br>(CDCl <sub>3</sub> ) δ <sub>H</sub> | White et al.<br>1992 [147]<br>(CDCl <sub>3</sub> ) δ <sub>H</sub> | Houssen et al. 2006<br>[38]<br>(DMSO- <i>d</i> <sub>6</sub> ) δ <sub>H</sub> | Fürstner et al. 2007<br>[148]<br>(CDCl <sub>3</sub> ) δ <sub>H</sub> |
|------|--------------------------------------------|----------------------------------------------------------|--------------------------------------------------------------------|-----------------------------------------------------------------------|------------------------------------------------------------------|-------------------------------------------------------------------|------------------------------------------------------------------------------|----------------------------------------------------------------------|
| 1    |                                            |                                                          |                                                                    |                                                                       |                                                                  |                                                                   |                                                                              |                                                                      |
| 2    | 5.62 brs                                   | 5.68 brs                                                 | 5.69 d                                                             | 5.69 d                                                                | 5.62 s                                                           | 5.62 s                                                            | 5.54 d                                                                       | 5.65–5.69 m                                                          |
| 3    |                                            |                                                          |                                                                    |                                                                       |                                                                  |                                                                   |                                                                              |                                                                      |
| 4 α  | 3.43–3.35 m                                | 3.48–3.39 m                                              |                                                                    | 3.00 dt                                                               | 3.39–3.43 m                                                      |                                                                   | 3.18 dt                                                                      |                                                                      |
| 4 β  | 2.52–2.34 m                                | 2.72 m                                                   | 2.60 m                                                             | 2.60 dt                                                               | 2.64–2.74 m                                                      | 2.74–2.63 m                                                       | 2.30 dt                                                                      | 2.62–2.77 m                                                          |
| 5 α  | 2.32 m                                     | 2.66 m                                                   | 2.26 m                                                             | 2.26 m                                                                | 2.23–2.28 m                                                      | 2.30–2.26 m                                                       | 2.20 m                                                                       | 2.23–2.34 m                                                          |
| 5 β  | 2.24 m                                     | 2.26 m                                                   |                                                                    | 2.26 m                                                                |                                                                  |                                                                   | 2.12 m                                                                       |                                                                      |
| 6    | 5.76 ddd                                   | 5.73 dt                                                  | 5.74 dt                                                            | 5.74 dt                                                               | 5.74 dt                                                          | 5.73 dt                                                           | 5.69 ddd                                                                     | 5.74 s                                                               |
| 7    | 6.56 dd                                    | 6.41 dd                                                  | 6.41 dd                                                            | 6.41 dd                                                               | 6.40 dd                                                          | 6.40 dd                                                           | 6.46 dd                                                                      | 6.40 dt                                                              |
| 8    | 6.01 t                                     | 5.97 t                                                   | 5.98 t                                                             | 5.98 t                                                                | 5.97 dd                                                          | 5.97 t                                                            | 5.93                                                                         | 5.97 dd                                                              |
| 9    | 4.98 m                                     | 5.00 t                                                   | 5.02 t                                                             | 5.02 t                                                                | 5.01 dd                                                          | 5.01 t                                                            | 4.91                                                                         | 5.01 dd                                                              |
| 10   | 2.91 m                                     | 2.92 m                                                   | 2.83 m                                                             | 2.83 m                                                                | 2.86–2.92 m                                                      | 2.91–2.85 m                                                       | 2.80                                                                         | 2.86–2.95 m                                                          |
| 11 α | 2.10 dt                                    | 2.08 dt                                                  |                                                                    |                                                                       | 2.04–2.07 m                                                      | 2.06 dt                                                           | 1.69                                                                         | 2.04–2.07 m                                                          |
| 11 β | 1.79 dd                                    | 1.75 m                                                   |                                                                    |                                                                       |                                                                  |                                                                   | 0.91                                                                         |                                                                      |
| 12   | 1.08–1.02 m                                | 1.12–1.01 m                                              |                                                                    |                                                                       | 1.06–1.11 m                                                      | 1.12–1.03 m                                                       | 1.22                                                                         | 1.01–1.14 m                                                          |
| 13   | 3.83 t                                     | 3.85 t                                                   | 4.29 m                                                             | 4.29 m                                                                | 4.22–4.26 m                                                      | 4.25 m                                                            | 4.28                                                                         | 4.2–4.3 m                                                            |
| 14 α | 1.65 dd                                    | 1.68 m                                                   |                                                                    |                                                                       |                                                                  | 1.71 m                                                            | 1.42 bs                                                                      |                                                                      |
| 14 β | 1.48 m                                     | 1.48 d                                                   |                                                                    |                                                                       |                                                                  | 1.49–1.39 m                                                       | 1.32 ddd                                                                     |                                                                      |
| 15   | 5.17 brt                                   | 5.40 p                                                   | 5.43 bt                                                            | 5.43 bt                                                               | 5.43 m                                                           | 5.43 p                                                            | 4.99 bs                                                                      | 5.42 m                                                               |
| 16   | 1.41 dq                                    | 1.42 m                                                   |                                                                    |                                                                       | 1.25–1.96 m                                                      | 1.82 d<br>1.79 d                                                  | 1.97 bd<br>1.53 dd                                                           | 1.24–1.98 m                                                          |
| 17   |                                            |                                                          |                                                                    |                                                                       |                                                                  |                                                                   |                                                                              |                                                                      |
| 18   | 4.46 dt                                    | 4.26 dt                                                  | 3.87 dd                                                            | 3.87 dd                                                               | 3.83–3.86 m                                                      | 3.89 s<br>3.85 dd                                                 | 3.63 dd                                                                      | 3.82–3.93 m                                                          |
| 19   | 3.47 m                                     | 3.45 m                                                   | 3.51 dd<br>3.48 dd                                                 | 3.51 dd                                                               | 3.46–3.51 m                                                      | 3.46 dd<br>3.44 dd                                                | 3.48 dd<br>3.32 dd                                                           | 3.37–3.52 m                                                          |
| 20   |                                            |                                                          |                                                                    |                                                                       |                                                                  |                                                                   |                                                                              |                                                                      |
| 21   | 1.94 s                                     | 1.92 s                                                   | 1.92 d                                                             | 1.92 d                                                                | 1.93 s                                                           | 1.92 dd                                                           | 1.83 d                                                                       | 1.93 s                                                               |
| 22   | 0.99 d                                     | 0.98 d                                                   | 0.98 d                                                             | 0.98 d                                                                | 0.99 d                                                           | 0.98 d                                                            | 0.87 d                                                                       | 0.98 d                                                               |
| NH   |                                            |                                                          | 6.3                                                                |                                                                       |                                                                  |                                                                   | 7.99                                                                         |                                                                      |
| OH   |                                            |                                                          | 5.8                                                                | 5.80 bs                                                               | 5.69 s                                                           | 5.69 s                                                            | 5.66                                                                         | 5.69 brs                                                             |

<sup>1</sup>H (600 MHz), all δ in ppm relative to MeOD = 3.35/49.0, or CDCl<sub>3</sub> = 7.26/77.0.

**Table S2.** A comparison of the <sup>13</sup>C-NMR Data reported for latrunculin A.

| C  | Experimental<br>Data<br>(MeOD) δ <sub>H</sub> | Experimental<br>Data<br>(CDCl <sub>3</sub> ) δ <sub>H</sub> | Kashman et al.<br>1980 [46]<br>(CDCl <sub>3</sub> ) δ <sub>H</sub> | Groweiss et al.,<br>1983 [112]<br>(CDCl <sub>3</sub> ) δ <sub>H</sub> | Smith et al.<br>1992 [48]<br>(CDCl <sub>3</sub> ) δ <sub>H</sub> | White et al.<br>1992 [147]<br>(CDCl <sub>3</sub> ) δ <sub>H</sub> | Houssen et al.<br>2006 [38]<br>(DMSO- <i>d</i> <sub>6</sub> ) δ <sub>H</sub> | Fürstner et al.<br>2007 [148]<br>(CDCl <sub>3</sub> ) δ <sub>H</sub> |                 |
|----|-----------------------------------------------|-------------------------------------------------------------|--------------------------------------------------------------------|-----------------------------------------------------------------------|------------------------------------------------------------------|-------------------------------------------------------------------|------------------------------------------------------------------------------|----------------------------------------------------------------------|-----------------|
| 1  | 168.5                                         | 165.6                                                       | 166.0                                                              | 166.0                                                                 | 165.3                                                            | 165.3                                                             | 166.3                                                                        | 165.4                                                                | qC              |
| 2  | 118.9                                         | 117.4                                                       | 117.6                                                              | 117.6                                                                 | 117.3                                                            | 117.3                                                             | 118.7                                                                        | 117.3                                                                | CH              |
| 3  | 160.1                                         | 158.4                                                       | 158.3                                                              | 158.3                                                                 | 158.5                                                            | 158.4                                                             | 157.8                                                                        | 158.3                                                                | qC              |
| 4  | 33.5                                          | 32.6                                                        | 32.7                                                               | 32.7                                                                  | 32.7                                                             | 32.7                                                              | 32.7                                                                         | 32.7                                                                 | CH <sub>2</sub> |
| 5  | 31.8                                          | 30.4                                                        | 30.6                                                               | 30.6                                                                  | 30.4                                                             | 30.4                                                              | 30.8                                                                         | 30.5                                                                 | CH <sub>2</sub> |
| 6  | 133.0                                         | 131.7                                                       | 131.8                                                              | 131.8                                                                 | 131.8                                                            | 131.8                                                             | 132.6                                                                        | 131.8                                                                | CH              |
| 7  | 127.6                                         | 126.0                                                       | 126.3                                                              | 126.3                                                                 | 126.0                                                            | 126.0                                                             | 126.8                                                                        | 126.0                                                                | CH              |
| 8  | 128.8                                         | 127.2                                                       | 127.3                                                              | 127.3                                                                 | 127.1                                                            | 127.2                                                             | 128.1                                                                        | 127.2                                                                | CH              |
| 9  | 137.1                                         | 136.4                                                       | 136.5                                                              | 136.5                                                                 | 136.5                                                            | 136.5                                                             | 136.5                                                                        | 136.5                                                                | CH              |
| 10 | 30.3                                          | 29.1                                                        | 29.2                                                               | 29.2                                                                  | 29.2                                                             | 29.2                                                              | 29.2                                                                         | 29.2                                                                 | CH              |
| 11 | 32.1                                          | 31.7                                                        | 31.2                                                               | 31.2                                                                  | 31.0                                                             | 31.0                                                              | 31.6                                                                         | 31.0                                                                 | CH <sub>2</sub> |
| 12 | 32.4                                          | 31.0                                                        | 31.8                                                               | 31.8                                                                  | 31.4                                                             | 31.4                                                              | 32.1                                                                         | 31.5                                                                 | CH <sub>2</sub> |
| 13 | 64.5                                          | 62.2                                                        | 62.3                                                               | 62.3                                                                  | 62.3                                                             | 62.3                                                              | 61.6                                                                         | 62.3                                                                 | CH              |
| 14 | 36.4                                          | 34.9                                                        | 35.1                                                               | 35.1                                                                  | 34.9                                                             | 34.9                                                              | 35.7                                                                         | 34.9                                                                 | CH <sub>2</sub> |
| 15 | 69.3                                          | 68.1                                                        | 68.1                                                               | 68.1                                                                  | 68.2                                                             | 68.2                                                              | 67.6                                                                         | 68.2                                                                 | CH              |
| 16 | 33.0                                          | 31.7                                                        | 32.1                                                               | 32.1                                                                  | 31.7                                                             | 31.8                                                              | 32.7                                                                         | 31.8                                                                 | CH <sub>2</sub> |
| 17 | 97.9                                          | 97.0                                                        | 96.9                                                               | 96.9                                                                  | 97.3                                                             | 97.3                                                              | 96.4                                                                         | 97.3                                                                 | qC              |
| 18 | 63.2                                          | 61.6                                                        | 62.1                                                               | 62.1                                                                  | 62.3                                                             | 62.3                                                              | 62.9                                                                         | 62.4                                                                 | CH              |
| 19 | 29.6                                          | 28.6                                                        | 28.7                                                               | 28.7                                                                  | 28.7                                                             | 28.7                                                              | 28.5                                                                         | 28.7                                                                 | CH <sub>2</sub> |
| 20 | 177.8                                         | 175.1                                                       | 175.5                                                              | 175.5                                                                 | 174.6                                                            | 174.6                                                             | 173.9                                                                        | 174.8                                                                | qC              |
| 21 | 25.0                                          | 24.5                                                        | 24.7                                                               | 24.7                                                                  | 24.5                                                             | 24.5                                                              | 25.0                                                                         | 24.5                                                                 | CH <sub>3</sub> |
| 22 | 22.3                                          | 21.6                                                        | 21.8                                                               | 21.8                                                                  | 21.6                                                             | 21.6                                                              | 22.6                                                                         | 21.6                                                                 | CH <sub>3</sub> |

<sup>13</sup>C NMR (150 MHz), all δ in ppm relative to MeOD = 3.35/49.0, or CDCl<sub>3</sub> = 7.26/77.0. Multiplicities determined by DEPT.

Latrunculin A: C<sub>22</sub>H<sub>31</sub>NO<sub>5</sub>S, white amorphous solid (22.4 mg, ~400 µg/specimen); [α]<sub>D</sub><sup>20</sup> + 273.5 (c 0.1, CHCl<sub>3</sub>); <sup>1</sup>H- and <sup>13</sup>C-NMR (Tables S1 and S2.); HR-ESI-MS m/z 444.0638 [M + Na]<sup>+</sup> (calcd. for C<sub>22</sub>H<sub>31</sub>NO<sub>5</sub>S + Na, 444.1821).

**Table S3.** Amino acid mutations of actin proteins reported to inhibit binding of latrunculins.

| Amino Acid Mutations | Subdomain | References      |
|----------------------|-----------|-----------------|
| Tyr 69 (Y)           | II        | [55,104]        |
| Glu 117 (E)          | III       | [103]           |
| Asp 157 (D)          | III       | [52,55,104]     |
| Val 159 (V)          | III       | [99]            |
| Arg 183 (R)          | IV        | [51,60,100,104] |
| Asp 184 (D)          | IV        | [51,60,104]     |
| Thr 186 (T)          | IV        | [55,104]        |
| Asp 187 (D)          | IV        | [101]           |
| Arg 196 (R)          | IV        | [102]           |
| Arg 210 (R)          | IV        | [51,55,104]     |
| Asp 211 (D)          | IV        | [51]            |
| Lys 213 (K)          | IV        | [51]            |
| Glu 214 (E)          | IV        | [51,55,104]     |
| Lys 215 (K)          | IV        | [51]            |
| Arg 335 (R)          | I         | [105]           |

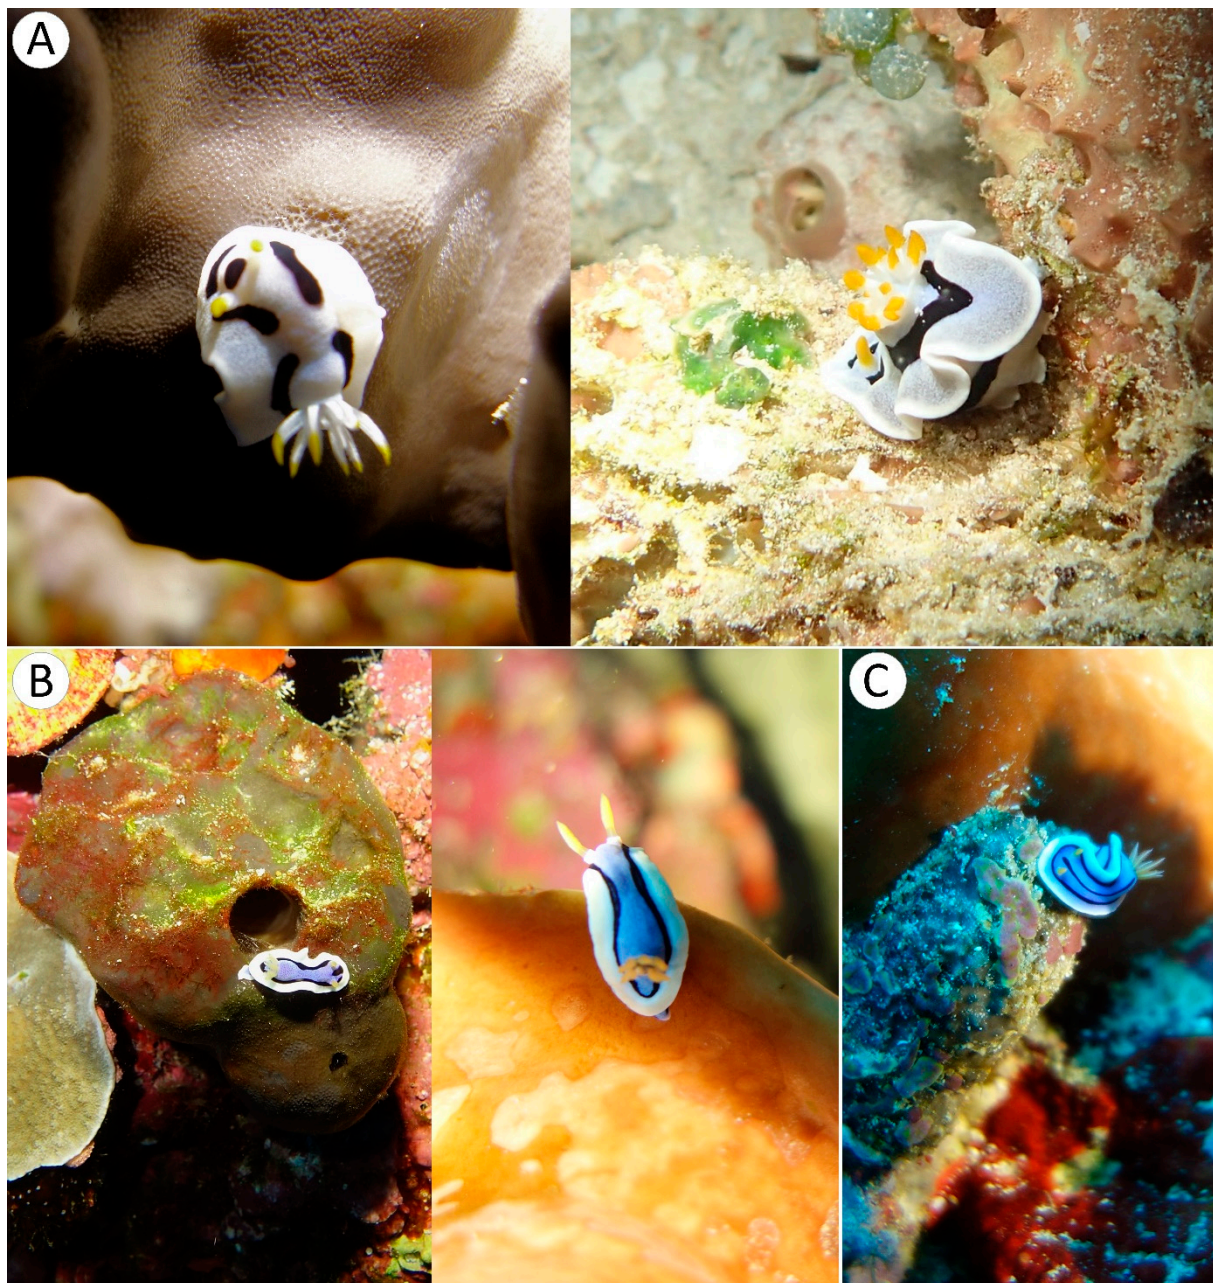

**Figure S7.** *Chromodoris* specimens as found in the field on their substrates. (A) *C. diana* specimens found on *C. mycofijiensis* with visible feeding traces, left, and on a sponge belonging to the subfamily Thorectinae, right; (B) *C. annae* specimens found on *C. mycofijiensis* with feeding traces, left and middle; (C) *C. lochi* on a sponge belonging to the family Petrosiidae.

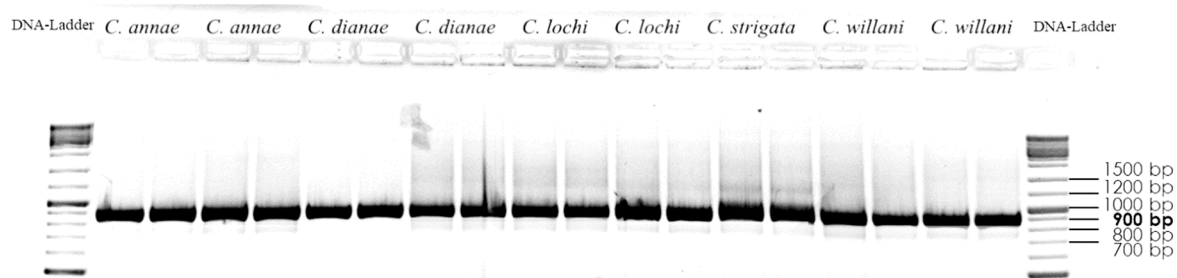

**Figure S8.** Exemplary gel-electrophoresis image of *Chromodoris* putative actin gene fragments (~885 bp), amplified by polymerase chain reaction (PCR) and stained with ethidium bromide.

**Table S4.** Recipe for 10 mL isotonic solution (~ 1000 mOsmoles).

| H <sub>2</sub> Odest                 | 10 mL    |
|--------------------------------------|----------|
| NaCl                                 | 125.0 mg |
| Glucose                              | 62.4 mg  |
| MgSO <sub>4</sub> ·7H <sub>2</sub> O | 62.4 mg  |
| KCl                                  | 3.44 mg  |
| NaHCO <sub>3</sub>                   | 1.92 mg  |
| MgCl <sub>2</sub> ·6H <sub>2</sub> O | 57.0 mg  |
| CaCl <sub>2</sub>                    | 14.88 mg |

**Table S5.** NCBI BLAST result for *Chromodoris annae* actin isoform nucleotide sequence.

| Description                                                                                                | Scientific Name                   | Query Cover | Per. Ident | Accession      |
|------------------------------------------------------------------------------------------------------------|-----------------------------------|-------------|------------|----------------|
| PREDICTED: Urocitellus parryii actin, alpha 1, skeletal muscle (Acta1), transcript variant X2, mRNA        | <i>Urocitellus parryii</i>        | 99%         | 72.4%      | XM_026412460.1 |
| PREDICTED: Urocitellus parryii actin, alpha 1, skeletal muscle (Acta1), transcript variant X1, mRNA        | <i>Urocitellus parryii</i>        | 99%         | 72.4%      | XM_026412451.1 |
| PREDICTED: Ictidomys tridecemlineatus actin, alpha 1, skeletal muscle (Acta1), transcript variant X2, mRNA | <i>Ictidomys tridecemlineatus</i> | 99%         | 72.1%      | XM_005320387.2 |
| PREDICTED: Ictidomys tridecemlineatus actin, alpha 1, skeletal muscle (Acta1), transcript variant X1, mRNA | <i>Ictidomys tridecemlineatus</i> | 99%         | 72.1%      | XM_005320386.2 |
| PREDICTED: Pantherophis guttatus actin, gamma-enteric smooth muscle (LOC117673363), mRNA                   | <i>Pantherophis guttatus</i>      | 99%         | 71.9%      | XM_034430717.1 |
| Artemia franciscana mRNA for actin (actin 302 gene), clone RT-PCR-16                                       | <i>Artemia franciscana</i>        | 99%         | 71.7%      | AJ269582.1     |
| Dictyocaulus viviparus actin variant 2 mRNA, complete cds                                                  | <i>Dictyocaulus viviparus</i>     | 99%         | 71.6%      | EU169822.1     |
| Artemia franciscana mRNA for actin (actin 302 gene), clone RT-PCR-14                                       | <i>Artemia franciscana</i>        | 99%         | 71.5%      | AJ269586.1     |
| Artemia franciscana mRNA for actin (actin 302 gene), clone RT-PCR-3                                        | <i>Artemia franciscana</i>        | 99%         | 71.5%      | AJ269583.1     |
| Artemia franciscana mRNA for actin (actin 302 gene), clone RT-PCR-13                                       | <i>Artemia franciscana</i>        | 99%         | 71.5%      | AJ269580.1     |
| Artemia franciscana mRNA for actin (actin 302 gene), clone RT-PCR-9                                        | <i>Artemia franciscana</i>        | 99%         | 71.5%      | AJ269579.1     |
| Artemia franciscana mRNA for actin (actin 302 gene), clone RT-PCR-11                                       | <i>Artemia franciscana</i>        | 99%         | 71.5%      | AJ269578.1     |
| Artemia franciscana mRNA for actin (actin 302 gene), clone RT-PCR-18                                       | <i>Artemia franciscana</i>        | 99%         | 71.5%      | AJ269581.1     |
| Artemia franciscana mRNA for actin (actin 302 gene), clone RT-PCR-19                                       | <i>Artemia franciscana</i>        | 99%         | 71.4%      | AJ269577.1     |
| Artemia franciscana mRNA for actin (actin 302 gene), clone RT-PCR-15                                       | <i>Artemia franciscana</i>        | 99%         | 71.4%      | AJ269575.1     |
| Artemia franciscana mRNA for actin (actin 302 gene), clone RT-PCR-17                                       | <i>Artemia franciscana</i>        | 99%         | 71.4%      | AJ269574.1     |
| Artemia franciscana mRNA for actin (actin 302 gene), clone RT-PCR-1                                        | <i>Artemia franciscana</i>        | 99%         | 71.4%      | AJ269567.1     |
| Artemia mRNA for actin (clone pArAct302)                                                                   | <i>Artemia sp.</i>                | 99%         | 71.4%      | X52604.1       |
| PREDICTED: Drosophila suzukii actin-87E (LOC118877550), mRNA                                               | <i>Drosophila suzukii</i>         | 99%         | 71.4%      | XM_036816658.1 |
| PREDICTED: Lepidothrix coronata actin, alpha 2, smooth muscle, aorta (ACTA2), mRNA                         | <i>Lepidothrix coronata</i>       | 99%         | 71.4%      | XM_017803871.1 |
| PREDICTED: Chiroxiphia lanceolata actin alpha 2, smooth muscle (ACTA2), mRNA                               | <i>Chiroxiphia lanceolata</i>     | 99%         | 71.4%      | XM_032695678.1 |
| PREDICTED: Corapipo altera actin, alpha 2, smooth muscle, aorta (ACTA2), mRNA                              | <i>Corapipo altera</i>            | 99%         | 71.2%      | XM_027648332.1 |
| PREDICTED: Denticeps clupeoides actin, alpha skeletal muscle 2 (LOC114795339), mRNA                        | <i>Denticeps clupeoides</i>       | 99%         | 71.2%      | XM_028988485.1 |
| PREDICTED: Erinaceus europaeus actin, alpha skeletal muscle (LOC103127961), transcript variant X2, mRNA    | <i>Erinaceus europaeus</i>        | 99%         | 71.1%      | XM_007538841.2 |
| PREDICTED: Erinaceus europaeus actin, alpha skeletal muscle (LOC103127961), transcript variant X1, mRNA    | <i>Erinaceus europaeus</i>        | 99%         | 71.1%      | XM_007538840.1 |
| PREDICTED: Chinchilla lanigera actin, alpha 1, skeletal muscle (Acta1), mRNA                               | <i>Chinchilla lanigera</i>        | 99%         | 71.1%      | XM_005405008.1 |
| PREDICTED: Opisthocomus hoazin actin, alpha 2, smooth muscle, aorta (ACTA2), transcript variant X2, mRNA   | <i>Opisthocomus hoazin</i>        | 99%         | 71.0%      | XM_009935662.1 |

|                                                                                                                             |                                        |            |              |                       |
|-----------------------------------------------------------------------------------------------------------------------------|----------------------------------------|------------|--------------|-----------------------|
| PREDICTED: <i>Opisthocomus hoazin</i> actin, alpha 2, smooth muscle, aorta (ACTA2), transcript variant X1, mRNA             | <i>Opisthocomus hoazin</i>             | 99%        | 71.0%        | XM_009935660.1        |
| PREDICTED: <i>Pan troglodytes</i> actin, alpha 1, skeletal muscle (ACTA1), mRNA                                             | <i>Pan troglodytes</i>                 | 99%        | 71.0%        | XM_016940594.1        |
| PREDICTED: <i>Pterocles gutturalis</i> actin, alpha 2, smooth muscle, aorta (ACTA2), transcript variant X2, mRNA            | <i>Pterocles gutturalis</i>            | 99%        | 70.9%        | XM_010082746.1        |
| PREDICTED: <i>Pterocles gutturalis</i> actin, alpha 2, smooth muscle, aorta (ACTA2), transcript variant X1, mRNA            | <i>Pterocles gutturalis</i>            | 99%        | 70.9%        | XM_010082745.1        |
| PREDICTED: <i>Catharus ustulatus</i> actin alpha 2, smooth muscle (ACTA2), mRNA                                             | <i>Catharus ustulatus</i>              | 99%        | 70.9%        | XM_033065747.1        |
| PREDICTED: <i>Aptenodytes forsteri</i> actin, alpha 2, smooth muscle, aorta (ACTA2), mRNA                                   | <i>Aptenodytes forsteri</i>            | 99%        | 70.9%        | XM_009277749.2        |
| PREDICTED: <i>Pygoscelis adeliae</i> actin, alpha 2, smooth muscle, aorta (ACTA2), mRNA                                     | <i>Pygoscelis adeliae</i>              | 99%        | 70.8%        | XM_009320191.1        |
| PREDICTED: <i>Balearica regulorum gibbericeps</i> actin, alpha 2, smooth muscle, aorta (ACTA2), transcript variant X2, mRNA | <i>Balearica regulorum gibbericeps</i> | 99%        | 70.7%        | XM_010305821.1        |
| PREDICTED: <i>Balearica regulorum gibbericeps</i> actin, alpha 2, smooth muscle, aorta (ACTA2), transcript variant X1, mRNA | <i>Balearica regulorum gibbericeps</i> | 99%        | 70.7%        | XM_010305820.1        |
| PREDICTED: <i>Egretta garzetta</i> actin alpha 2, smooth muscle (ACTA2), transcript variant X3, mRNA                        | <i>Egretta garzetta</i>                | 99%        | 70.7%        | XM_035897268.1        |
| PREDICTED: <i>Egretta garzetta</i> actin alpha 2, smooth muscle (ACTA2), transcript variant X2, mRNA                        | <i>Egretta garzetta</i>                | 99%        | 70.7%        | XM_035897267.1        |
| PREDICTED: <i>Egretta garzetta</i> actin alpha 2, smooth muscle (ACTA2), transcript variant X1, mRNA                        | <i>Egretta garzetta</i>                | 99%        | 70.7%        | XM_035897266.1        |
| PREDICTED: <i>Perca fluviatilis</i> actin, alpha cardiac muscle 1 (LOC120549587), mRNA                                      | <i>Perca fluviatilis</i>               | 99%        | 70.7%        | XM_039786604.1        |
| PREDICTED: <i>Orbicella faveolata</i> actin, cytoplasmic 1 (LOC110065202), mRNA                                             | <i>Orbicella faveolata</i>             | 99%        | 70.6%        | XM_020772311.1        |
| PREDICTED: <i>Fulmarus glacialis</i> actin, alpha 2, smooth muscle, aorta (ACTA2), transcript variant X2, mRNA              | <i>Fulmarus glacialis</i>              | 99%        | 70.6%        | XM_009576330.1        |
| PREDICTED: <i>Fulmarus glacialis</i> actin, alpha 2, smooth muscle, aorta (ACTA2), transcript variant X1, mRNA              | <i>Fulmarus glacialis</i>              | 99%        | 70.6%        | XM_009576329.1        |
| PREDICTED: <i>Gymnodraco acuticeps</i> actin, alpha skeletal muscle (LOC117544084), mRNA                                    | <i>Gymnodraco acuticeps</i>            | 99%        | 70.5%        | XM_034213253.1        |
| PREDICTED: <i>Hipposideros armiger</i> actin, alpha 1, skeletal muscle (ACTA1), transcript variant X2, mRNA                 | <i>Hipposideros armiger</i>            | 99%        | 70.5%        | XM_019626360.1        |
| PREDICTED: <i>Hipposideros armiger</i> actin, alpha 1, skeletal muscle (ACTA1), transcript variant X1, mRNA                 | <i>Hipposideros armiger</i>            | 99%        | 70.5%        | XM_019626358.1        |
| PREDICTED: <i>Sturnus vulgaris</i> actin, alpha 2, smooth muscle, aorta (ACTA2), mRNA                                       | <i>Sturnus vulgaris</i>                | 99%        | 70.4%        | XM_014875386.1        |
| PREDICTED: <i>Pseudochaenichthys georgianus</i> actin, alpha skeletal muscle (LOC117468060), mRNA                           | <i>Pseudochaenichthys georgianus</i>   | 99%        | 70.4%        | XM_034112020.1        |
| PREDICTED: <i>Trematomus bernacchii</i> actin, alpha skeletal muscle (LOC117478450), mRNA                                   | <i>Trematomus bernacchii</i>           | 99%        | 70.4%        | XM_034125513.1        |
| PREDICTED: <i>Vombatus ursinus</i> actin, alpha skeletal muscle (LOC114049606), mRNA                                        | <i>Vombatus ursinus</i>                | 99%        | 70.4%        | XM_027870867.1        |
| PREDICTED: <i>Vombatus ursinus</i> actin, alpha skeletal muscle (LOC114049602), mRNA                                        | <i>Vombatus ursinus</i>                | 99%        | 70.4%        | XM_027870861.1        |
| PREDICTED: <i>Phascolarctos cinereus</i> actin, alpha 1, skeletal muscle (ACTA1), mRNA                                      | <i>Phascolarctos cinereus</i>          | 99%        | 70.3%        | XM_021000483.1        |
| PREDICTED: <i>Charadrius vociferus</i> actin, alpha 2, smooth muscle, aorta (ACTA2), transcript variant X2, mRNA            | <i>Charadrius vociferus</i>            | 99%        | 70.3%        | XM_009888704.1        |
| PREDICTED: <i>Charadrius vociferus</i> actin, alpha 2, smooth muscle, aorta (ACTA2), transcript variant X1, mRNA            | <i>Charadrius vociferus</i>            | 99%        | 70.3%        | XM_009888702.1        |
| <u><i>Clupea harengus</i> actin alpha 1, skeletal muscle a (acta1a), mRNA</u>                                               | <u><i>Clupea harengus</i></u>          | <u>99%</u> | <u>70.3%</u> | <u>NM_001309834.1</u> |

**Table S6.** NCBI BLAST result for *Chromodoris annae* actin isoform nucleotide sequence.

| Description                                                                                                | Scientific Name                   | Query Cover | Per. Ident | Accession      |
|------------------------------------------------------------------------------------------------------------|-----------------------------------|-------------|------------|----------------|
| PREDICTED: Urocitellus parryii actin, alpha 1, skeletal muscle (Acta1), transcript variant X2, mRNA        | <i>Urocitellus parryii</i>        | 99%         | 72.4%      | XM_026412460.1 |
| PREDICTED: Urocitellus parryii actin, alpha 1, skeletal muscle (Acta1), transcript variant X1, mRNA        | <i>Urocitellus parryii</i>        | 99%         | 72.4%      | XM_026412451.1 |
| PREDICTED: Ictidomys tridecemlineatus actin, alpha 1, skeletal muscle (Acta1), transcript variant X2, mRNA | <i>Ictidomys tridecemlineatus</i> | 99%         | 72.1%      | XM_005320387.2 |
| PREDICTED: Ictidomys tridecemlineatus actin, alpha 1, skeletal muscle (Acta1), transcript variant X1, mRNA | <i>Ictidomys tridecemlineatus</i> | 99%         | 72.1%      | XM_005320386.2 |
| PREDICTED: Pantherophis guttatus actin, gamma-enteric smooth muscle (LOC117673363), mRNA                   | <i>Pantherophis guttatus</i>      | 99%         | 71.9%      | XM_034430717.1 |
| Artemia franciscana mRNA for actin (actin 302 gene), clone RT-PCR-16                                       | <i>Artemia franciscana</i>        | 99%         | 71.7%      | AJ269582.1     |
| Dictyocaulus viviparus actin variant 2 mRNA, complete cds                                                  | <i>Dictyocaulus viviparus</i>     | 99%         | 71.6%      | EU169822.1     |
| Artemia franciscana mRNA for actin (actin 302 gene), clone RT-PCR-14                                       | <i>Artemia franciscana</i>        | 99%         | 71.5%      | AJ269586.1     |
| Artemia franciscana mRNA for actin (actin 302 gene), clone RT-PCR-3                                        | <i>Artemia franciscana</i>        | 99%         | 71.5%      | AJ269583.1     |
| Artemia franciscana mRNA for actin (actin 302 gene), clone RT-PCR-13                                       | <i>Artemia franciscana</i>        | 99%         | 71.5%      | AJ269580.1     |
| Artemia franciscana mRNA for actin (actin 302 gene), clone RT-PCR-9                                        | <i>Artemia franciscana</i>        | 99%         | 71.5%      | AJ269579.1     |
| Artemia franciscana mRNA for actin (actin 302 gene), clone RT-PCR-11                                       | <i>Artemia franciscana</i>        | 99%         | 71.5%      | AJ269578.1     |
| Artemia franciscana mRNA for actin (actin 302 gene), clone RT-PCR-18                                       | <i>Artemia franciscana</i>        | 99%         | 71.5%      | AJ269581.1     |
| Artemia franciscana mRNA for actin (actin 302 gene), clone RT-PCR-19                                       | <i>Artemia franciscana</i>        | 99%         | 71.4%      | AJ269577.1     |
| Artemia franciscana mRNA for actin (actin 302 gene), clone RT-PCR-15                                       | <i>Artemia franciscana</i>        | 99%         | 71.4%      | AJ269575.1     |
| Artemia franciscana mRNA for actin (actin 302 gene), clone RT-PCR-17                                       | <i>Artemia franciscana</i>        | 99%         | 71.4%      | AJ269574.1     |
| Artemia franciscana mRNA for actin (actin 302 gene), clone RT-PCR-1                                        | <i>Artemia franciscana</i>        | 99%         | 71.4%      | AJ269567.1     |
| Artemia mRNA for actin (clone pArAct302)                                                                   | <i>Artemia sp.</i>                | 99%         | 71.4%      | X52604.1       |
| PREDICTED: Drosophila suzukii actin-87E (LOC118877550), mRNA                                               | <i>Drosophila suzukii</i>         | 99%         | 71.4%      | XM_036816658.1 |
| PREDICTED: Lepidothrix coronata actin, alpha 2, smooth muscle, aorta (ACTA2), mRNA                         | <i>Lepidothrix coronata</i>       | 99%         | 71.4%      | XM_017803871.1 |
| PREDICTED: Chiroxiphia lanceolata actin alpha 2, smooth muscle (ACTA2), mRNA                               | <i>Chiroxiphia lanceolata</i>     | 99%         | 71.4%      | XM_032695678.1 |
| PREDICTED: Corapipo altera actin, alpha 2, smooth muscle, aorta (ACTA2), mRNA                              | <i>Corapipo altera</i>            | 99%         | 71.2%      | XM_027648332.1 |
| PREDICTED: Denticeps clupeoides actin, alpha skeletal muscle 2 (LOC114795339), mRNA                        | <i>Denticeps clupeoides</i>       | 99%         | 71.2%      | XM_028988485.1 |
| PREDICTED: Erinaceus europaeus actin, alpha skeletal muscle (LOC103127961), transcript variant X2, mRNA    | <i>Erinaceus europaeus</i>        | 99%         | 71.1%      | XM_007538841.2 |
| PREDICTED: Erinaceus europaeus actin, alpha skeletal muscle (LOC103127961), transcript variant X1, mRNA    | <i>Erinaceus europaeus</i>        | 99%         | 71.1%      | XM_007538840.1 |
| PREDICTED: Chinchilla lanigera actin, alpha 1, skeletal muscle (Acta1), mRNA                               | <i>Chinchilla lanigera</i>        | 99%         | 71.1%      | XM_005405008.1 |
| PREDICTED: Opisthocomus hoazin actin, alpha 2, smooth muscle, aorta (ACTA2), transcript variant X2, mRNA   | <i>Opisthocomus hoazin</i>        | 99%         | 71.0%      | XM_009935662.1 |

|                                                                                                                             |                                        |            |              |                       |
|-----------------------------------------------------------------------------------------------------------------------------|----------------------------------------|------------|--------------|-----------------------|
| PREDICTED: <i>Opisthocomus hoazin</i> actin, alpha 2, smooth muscle, aorta (ACTA2), transcript variant X1, mRNA             | <i>Opisthocomus hoazin</i>             | 99%        | 71.0%        | XM_009935660.1        |
| PREDICTED: <i>Pan troglodytes</i> actin, alpha 1, skeletal muscle (ACTA1), mRNA                                             | <i>Pan troglodytes</i>                 | 99%        | 71.0%        | XM_016940594.1        |
| PREDICTED: <i>Pterocles gutturalis</i> actin, alpha 2, smooth muscle, aorta (ACTA2), transcript variant X2, mRNA            | <i>Pterocles gutturalis</i>            | 99%        | 70.9%        | XM_010082746.1        |
| PREDICTED: <i>Pterocles gutturalis</i> actin, alpha 2, smooth muscle, aorta (ACTA2), transcript variant X1, mRNA            | <i>Pterocles gutturalis</i>            | 99%        | 70.9%        | XM_010082745.1        |
| PREDICTED: <i>Catharus ustulatus</i> actin alpha 2, smooth muscle (ACTA2), mRNA                                             | <i>Catharus ustulatus</i>              | 99%        | 70.9%        | XM_033065747.1        |
| PREDICTED: <i>Aptenodytes forsteri</i> actin, alpha 2, smooth muscle, aorta (ACTA2), mRNA                                   | <i>Aptenodytes forsteri</i>            | 99%        | 70.9%        | XM_009277749.2        |
| PREDICTED: <i>Pygoscelis adeliae</i> actin, alpha 2, smooth muscle, aorta (ACTA2), mRNA                                     | <i>Pygoscelis adeliae</i>              | 99%        | 70.8%        | XM_009320191.1        |
| PREDICTED: <i>Balearica regulorum gibbericeps</i> actin, alpha 2, smooth muscle, aorta (ACTA2), transcript variant X2, mRNA | <i>Balearica regulorum gibbericeps</i> | 99%        | 70.7%        | XM_010305821.1        |
| PREDICTED: <i>Balearica regulorum gibbericeps</i> actin, alpha 2, smooth muscle, aorta (ACTA2), transcript variant X1, mRNA | <i>Balearica regulorum gibbericeps</i> | 99%        | 70.7%        | XM_010305820.1        |
| PREDICTED: <i>Egretta garzetta</i> actin alpha 2, smooth muscle (ACTA2), transcript variant X3, mRNA                        | <i>Egretta garzetta</i>                | 99%        | 70.7%        | XM_035897268.1        |
| PREDICTED: <i>Egretta garzetta</i> actin alpha 2, smooth muscle (ACTA2), transcript variant X2, mRNA                        | <i>Egretta garzetta</i>                | 99%        | 70.7%        | XM_035897267.1        |
| PREDICTED: <i>Egretta garzetta</i> actin alpha 2, smooth muscle (ACTA2), transcript variant X1, mRNA                        | <i>Egretta garzetta</i>                | 99%        | 70.7%        | XM_035897266.1        |
| PREDICTED: <i>Perca fluviatilis</i> actin, alpha cardiac muscle 1 (LOC120549587), mRNA                                      | <i>Perca fluviatilis</i>               | 99%        | 70.7%        | XM_039786604.1        |
| PREDICTED: <i>Orbicella faveolata</i> actin, cytoplasmic 1 (LOC110065202), mRNA                                             | <i>Orbicella faveolata</i>             | 99%        | 70.6%        | XM_020772311.1        |
| PREDICTED: <i>Fulmarus glacialis</i> actin, alpha 2, smooth muscle, aorta (ACTA2), transcript variant X2, mRNA              | <i>Fulmarus glacialis</i>              | 99%        | 70.6%        | XM_009576330.1        |
| PREDICTED: <i>Fulmarus glacialis</i> actin, alpha 2, smooth muscle, aorta (ACTA2), transcript variant X1, mRNA              | <i>Fulmarus glacialis</i>              | 99%        | 70.6%        | XM_009576329.1        |
| PREDICTED: <i>Gymnodraco acuticeps</i> actin, alpha skeletal muscle (LOC117544084), mRNA                                    | <i>Gymnodraco acuticeps</i>            | 99%        | 70.5%        | XM_034213253.1        |
| PREDICTED: <i>Hipposideros armiger</i> actin, alpha 1, skeletal muscle (ACTA1), transcript variant X2, mRNA                 | <i>Hipposideros armiger</i>            | 99%        | 70.5%        | XM_019626360.1        |
| PREDICTED: <i>Hipposideros armiger</i> actin, alpha 1, skeletal muscle (ACTA1), transcript variant X1, mRNA                 | <i>Hipposideros armiger</i>            | 99%        | 70.5%        | XM_019626358.1        |
| PREDICTED: <i>Sturnus vulgaris</i> actin, alpha 2, smooth muscle, aorta (ACTA2), mRNA                                       | <i>Sturnus vulgaris</i>                | 99%        | 70.4%        | XM_014875386.1        |
| PREDICTED: <i>Pseudochaenichthys georgianus</i> actin, alpha skeletal muscle (LOC117468060), mRNA                           | <i>Pseudochaenichthys georgianus</i>   | 99%        | 70.4%        | XM_034112020.1        |
| PREDICTED: <i>Trematomus bernacchii</i> actin, alpha skeletal muscle (LOC117478450), mRNA                                   | <i>Trematomus bernacchii</i>           | 99%        | 70.4%        | XM_034125513.1        |
| PREDICTED: <i>Vombatus ursinus</i> actin, alpha skeletal muscle (LOC114049606), mRNA                                        | <i>Vombatus ursinus</i>                | 99%        | 70.4%        | XM_027870867.1        |
| PREDICTED: <i>Vombatus ursinus</i> actin, alpha skeletal muscle (LOC114049602), mRNA                                        | <i>Vombatus ursinus</i>                | 99%        | 70.4%        | XM_027870861.1        |
| PREDICTED: <i>Phascolarctos cinereus</i> actin, alpha 1, skeletal muscle (ACTA1), mRNA                                      | <i>Phascolarctos cinereus</i>          | 99%        | 70.3%        | XM_021000483.1        |
| PREDICTED: <i>Charadrius vociferus</i> actin, alpha 2, smooth muscle, aorta (ACTA2), transcript variant X2, mRNA            | <i>Charadrius vociferus</i>            | 99%        | 70.3%        | XM_009888704.1        |
| PREDICTED: <i>Charadrius vociferus</i> actin, alpha 2, smooth muscle, aorta (ACTA2), transcript variant X1, mRNA            | <i>Charadrius vociferus</i>            | 99%        | 70.3%        | XM_009888702.1        |
| <u><i>Clupea harengus</i> actin alpha 1, skeletal muscle a (acta1a), mRNA</u>                                               | <u><i>Clupea harengus</i></u>          | <u>99%</u> | <u>70.3%</u> | <u>NM_001309834.1</u> |

**Table S7.** NCBI BLAST result for *Chromodoris annae* actin isoform amino acid sequence.

| Description                                                   | Scientific Name                       | Query Cover | Per. Ident   | Accession         |
|---------------------------------------------------------------|---------------------------------------|-------------|--------------|-------------------|
| actin, cytoplasmic-like [Branchiostoma floridae]              | <i>Branchiostoma floridae</i>         | 99%         | 79.5%        | XP_035697441.1    |
| unnamed protein product [Dimorphilus gyrotilatus]             | <i>Dimorphilus gyrotilatus</i>        | 99%         | 79.1%        | CAD5124374.1      |
| actin-2-like [Amblyraja radiata]                              | <i>Amblyraja radiata</i>              | 99%         | 79.1%        | XP_032876180.1    |
| ACTB_G1 [Mytilus coruscus]                                    | <i>Mytilus coruscus</i>               | 99%         | 79.1%        | CAC5391235.1      |
| actin A3 [ <b>Haliotis iris</b> ]                             | <b>Haliotis iris</b>                  | 99%         | <b>78.7%</b> | <b>AAX19288.1</b> |
| actin isoform X2 [Salvelinus namaycush]                       | <i>Salvelinus namaycush</i>           | 99%         | 78.7%        | XP_038842271.1    |
| hypothetical protein HELRODRAFT_96235 [Helobdella robusta]    | <i>Helobdella robusta</i>             | 99%         | 78.7%        | XP_009030330.1    |
| actin [Crotalaria spectabilis]                                | <i>Crotalaria spectabilis</i>         | 99%         | 78.7%        | CEO86982.1        |
| actin, non-muscle 6.2-like [Salvelinus alpinus]               | <i>Salvelinus alpinus</i>             | 99%         | 78.7%        | XP_023997352.1    |
| cytoplasmic actin [Hirudo medicinalis]                        | <i>Hirudo medicinalis</i>             | 99%         | 78.7%        | ABC60434.1        |
| hypothetical protein HELRODRAFT_185075 [Helobdella robusta]   | <i>Helobdella robusta</i>             | 99%         | 78.7%        | XP_009025437.1    |
| cytoplasmic actin [Hirudo medicinalis]                        | <i>Hirudo medicinalis</i>             | 99%         | 78.7%        | ABC60436.1        |
| actin, non-muscle 6.2 isoform X1 [Salvelinus namaycush]       | <i>Salvelinus namaycush</i>           | 99%         | 78.7%        | XP_038842264.1    |
| non-muscle actin II [Hydractinia echinata]                    | <i>Hydractinia echinata</i>           | 99%         | 78.7%        | ADR10434.1        |
| actin, cytoplasmic 2 [Pseudoalteromonas sp. BMB]              | <i>Pseudoalteromonas sp. BMB</i>      | 99%         | 78.7%        | WP_069019001.1    |
| actin, cytoplasmic-like [Branchiostoma floridae]              | <i>Branchiostoma floridae</i>         | 99%         | 78.7%        | XP_035695124.1    |
| hypothetical protein FO519_010338 [Halicephalobus sp. NKZ332] | <i>Halicephalobus sp. NKZ332</i>      | 99%         | 78.4%        | KAE9546450.1      |
| actin A2 [ <b>Haliotis iris</b> ]                             | <b>Haliotis iris</b>                  | 99%         | <b>78.4%</b> | <b>AAX19287.1</b> |
| actin-2-like isoform X1 [Mizuhopecten yessoensis]             | <i>Mizuhopecten yessoensis</i>        | 99%         | 78.4%        | XP_021356756.1    |
| predicted protein [Hordeum vulgare subsp. vulgare]            | <i>Hordeum vulgare subsp. vulgare</i> | 99%         | 78.4%        | BAJ97607.1        |
| Actin protein [Sycon ciliatum]                                | <i>Sycon ciliatum</i>                 | 99%         | 78.4%        | CCQ18644.1        |
| actin A1 [ <b>Haliotis iris</b> ]                             | <b>Haliotis iris</b>                  | 99%         | <b>78.4%</b> | <b>AAX19286.1</b> |
| ACTB_G1 [Mytilus coruscus]                                    | <i>Mytilus coruscus</i>               | 99%         | 78.4%        | CAC5420182.1      |
| actin [Euagrus chioseus]                                      | <i>Euagrus chioseus</i>               | 99%         | 78.4%        | ABZ91664.1        |
| Actin-4 [Caenorhabditis elegans]                              | <i>Caenorhabditis elegans</i>         | 99%         | 78.4%        | NP_001368079.1    |
| unnamed protein product [Spirometra erinaceieuropaei]         | <i>Spirometra erinaceieuropaei</i>    | 99%         | 78.4%        | VZI50703.1        |
| actin, non-muscle 6.2 [Thalassophryne amazonica]              | <i>Thalassophryne amazonica</i>       | 99%         | 78.4%        | XP_034027240.1    |
| PREDICTED: actin, non-muscle 6.2 [Hydra vulgaris]             | <i>Hydra vulgaris</i>                 | 99%         | 78.4%        | XP_002154462.1    |
| hypothetical protein LOTGIDRAFT_193218 [Lottia gigantea]      | <i>Lottia gigantea</i>                | 99%         | 78.4%        | XP_009060604.1    |
| actin [Thecamoeba similis]                                    | <i>Thecamoeba similis</i>             | 99%         | 78.4%        | AAQ55801.1        |
| actin [Euagrus chioseus]                                      | <i>Euagrus chioseus</i>               | 99%         | 78.4%        | ABZ91662.1        |
| PREDICTED: actin, adductor muscle [Octopus bimaculoides]      | <i>Octopus bimaculoides</i>           | 99%         | 78.4%        | XP_014771927.1    |

|                                                                             |                                     |     |              |                   |
|-----------------------------------------------------------------------------|-------------------------------------|-----|--------------|-------------------|
| Bm9237, isoform b [ <i>Brugia malayi</i> ]                                  | <i>Brugia malayi</i>                | 99% | 78.4%        | CDP93363.1        |
| non-muscle actin 6.2 [ <i>Malo kingi</i> ]                                  | <i>Malo kingi</i>                   | 99% | 78.4%        | ACY74447.1        |
| actin, cytoplasmic 2 [ <i>Escherichia coli</i> ]                            | <i>Escherichia coli</i>             | 99% | 78.4%        | WP_126755788.1    |
| unnamed protein product [ <i>Onchocerca ochengi</i> ]                       | <i>Onchocerca ochengi</i>           | 99% | 78.4%        | VDM97777.1        |
| Actin [ <i>Oesophagostomum dentatum</i> ]                                   | <i>Oesophagostomum dentatum</i>     | 99% | 78.4%        | KHJ95400.1        |
| hypothetical protein LOTGIDRAFT_208208 [ <i>Lottia gigantea</i> ]           | <i>Lottia gigantea</i>              | 99% | 78.4%        | XP_009043796.1    |
| actin [ <i>Bursaphelenchus xylophilus</i> ]                                 | <i>Bursaphelenchus xylophilus</i>   | 99% | 78.4%        | BAI52958.1        |
| PREDICTED: actin, non-muscle 6.2-like [ <i>Hydra vulgaris</i> ]             | <i>Hydra vulgaris</i>               | 99% | 78.4%        | XP_002154696.1    |
| actin [ <i>Stemonaria longa</i> ]                                           | <i>Stemonaria longa</i>             | 99% | 78.0%        | AFY23984.1        |
| beta-actin [ <i>Cepaea nemoralis</i> ]                                      | <i>Cepaea nemoralis</i>             | 99% | 78.0%        | AXI69344.1        |
| beta-actin 2 [ <b><i>Haliotis diversicolor</i></b> ]                        | <b><i>Haliotis diversicolor</i></b> | 99% | <b>78.0%</b> | <b>ABY87412.1</b> |
| actin [ <b><i>Haliotis diversicolor</i></b> ]                               | <b><i>Haliotis diversicolor</i></b> | 99% | <b>78.0%</b> | <b>ABU86741.1</b> |
| actin-2 isoform X1 [ <i>Pecten maximus</i> ]                                | <i>Pecten maximus</i>               | 99% | 78.0%        | XP_033737032.1    |
| actin-3-like [ <i>Mizuhopecten yessoensis</i> ]                             | <i>Mizuhopecten yessoensis</i>      | 99% | 78.0%        | XP_021356754.1    |
| actin [ <i>Mesenchytraeus solifugus</i> ]                                   | <i>Mesenchytraeus solifugus</i>     | 99% | 78.0%        | AOR07101.1        |
| actin [ <b><i>Haliotis tuberculata</i></b> ]                                | <b><i>Haliotis tuberculata</i></b>  | 99% | <b>78.0%</b> | <b>CAJ85786.1</b> |
| actin [ <i>Eisenia fetida</i> ]                                             | <i>Eisenia fetida</i>               | 99% | 78.0%        | AUS83928.1        |
| Actin actin domain containing protein [ <i>Meloidogyne graminiicola</i> ]   | <i>Meloidogyne graminiicola</i>     | 99% | 78.0%        | KAF7632952.1      |
| hypothetical protein L596_016279 [ <i>Steinernema carpocapsae</i> ]         | <i>Steinernema carpocapsae</i>      | 99% | 78.0%        | TKR82582.1        |
| actin-2-like [ <i>Mizuhopecten yessoensis</i> ]                             | <i>Mizuhopecten yessoensis</i>      | 99% | 78.0%        | XP_021356759.1    |
| ACTB_G1 [ <i>Mytilus coruscus</i> ]                                         | <i>Mytilus coruscus</i>             | 99% | 78.0%        | CAC5419237.1      |
| hypothetical protein EGW08_007646 [ <b><i>Elysia chlorotica</i></b> ]       | <b><i>Elysia chlorotica</i></b>     | 99% | <b>78.0%</b> | <b>RUS84619.1</b> |
| uncharacterized protein MONBRDRAFT_37852 [ <i>Monosiga brevicollis</i> MX1] | <i>Monosiga brevicollis</i> MX1     | 99% | 78.0%        | XP_001747496.1    |

Gastropoda shown in bold.

**Table S8.** NCBI BLAST result for *Elysia viridis* actin isoform amino acid sequence.

| Description                                                                                   | Scientific Name                | Query Cover | Per. Ident    | Accession         |
|-----------------------------------------------------------------------------------------------|--------------------------------|-------------|---------------|-------------------|
| actin [ <b><i>Plakobranthus ocellatus</i></b> ]                                               | <i>Plakobranthus ocellatus</i> | 100%        | <b>98.52%</b> | <b>GFN80144.1</b> |
| actin [ <b><i>Elysia marginata</i></b> ]                                                      | <i>Elysia marginata</i>        | 100%        | <b>98.52%</b> | <b>GFS25392.1</b> |
| RecName: Full=Actin, cytoplasmic, intermediate form; [ <b><i>Biomphalaria pfeifferi</i></b> ] | <i>Biomphalaria pfeifferi</i>  | 100%        | <b>97.79%</b> | <b>Q964E2.1</b>   |
| actin [ <b><i>Elysia marginata</i></b> ]                                                      | <i>Elysia marginata</i>        | 100%        | <b>97.79%</b> | <b>GFR57762.1</b> |
| actin 1 [ <i>Halisarca dujardini</i> ]                                                        | <i>Halisarca dujardini</i>     | 100%        | 97.79%        | Q5X72278.1        |
| actin [ <b><i>Elysia marginata</i></b> ]                                                      | <i>Elysia marginata</i>        | 100%        | <b>97.79%</b> | <b>GFR57757.1</b> |

|                                                                            |                                 |      |               |                     |
|----------------------------------------------------------------------------|---------------------------------|------|---------------|---------------------|
| hypothetical protein EGW08_006629 [ <b>Elysia chlorotica</b> ]             | <b>Elysia chlorotica</b>        | 100% | <b>97.79%</b> | <b>RUS85617.1</b>   |
| act protein isoform X1 [Ciona intestinalis]                                | <i>Ciona intestinalis</i>       | 100% | 97.42%        | XP_009861333.1      |
| actin, cytoplasmic [Asterias rubens]                                       | <i>Asterias rubens</i>          | 100% | 97.42%        | XP_033640031.1      |
| actin, cytoplasmic [Orbicella faveolata]                                   | <i>Orbicella faveolata</i>      | 100% | 97.42%        | XP_020600429.1      |
| hypothetical protein LDENG_00240370 [Lucifuga dentata]                     | <i>Lucifuga dentata</i>         | 100% | 97.42%        | KAF7643397.1        |
| actin 4 [Halisarca dujardini]                                              | <i>Halisarca dujardini</i>      | 100% | 97.42%        | QSDX72281.1         |
| beta-actin isotype 2 [ <b>Lymnaea stagnalis</b> ]                          | <b>Lymnaea stagnalis</b>        | 100% | <b>97.42%</b> | <b>AOV18887.1</b>   |
| beta actin [Doryteuthis pealeii]                                           | <i>Doryteuthis pealeii</i>      | 100% | 97.42%        | AAU11523.1          |
| cytoplasmic actin [Dreissena polymorpha]                                   | <i>Dreissena polymorpha</i>     | 100% | 97.42%        | AAC32224.1          |
| actin [ <b>Rapana venosa</b> ]                                             | <b>Rapana venosa</b>            | 100% | <b>97.42%</b> | <b>AGZ87937.1</b>   |
| unnamed protein product [ <b>Candidula unifasciata</b> ]                   | <b>Candidula unifasciata</b>    | 100% | <b>97.42%</b> | <b>CAG5123311.1</b> |
| actin, cytoplasmic-like [Actinia tenebrosa]                                | <i>Actinia tenebrosa</i>        | 100% | 97.05%        | XP_031571867.1      |
| Actin, cytoplasmic, intermediate form; [ <b>Biomphalaria tenagophila</b> ] | <b>Biomphalaria tenagophila</b> | 100% | <b>97.05%</b> | <b>Q964E0.1</b>     |
| PREDICTED: actin, cytoplasmic [Pundamilia nyererei]                        | <i>Pundamilia nyererei</i>      | 100% | 97.05%        | XP_005754021.1      |
| cytoplasmic actin 1 [Botryllus schlosseri]                                 | <i>Botryllus schlosseri</i>     | 100% | 97.05%        | CAX48981.1          |
| actin, cytoplasmic 1 [Nematostella vectensis]                              | <i>Nematostella vectensis</i>   | 100% | 97.05%        | XP_001637076.1      |
| actin, cytoplasmic [Exaiptasia diaphana]                                   | <i>Exaiptasia diaphana</i>      | 100% | 97.05%        | XP_020916414.1      |
| hypothetical protein BaRGS_009049 [ <b>Batillaria attramentaria</b> ]      | <b>Batillaria attramentaria</b> | 100% | <b>97.05%</b> | <b>KAG5710333.1</b> |
| actin, cytoplasmic [Nematostella vectensis]                                | <i>Nematostella vectensis</i>   | 100% | 97.05%        | XP_001621292.2      |
| actin, cytoplasmic 1-like [Sphaeramia orbicularis]                         | <i>Sphaeramia orbicularis</i>   | 100% | 97.05%        | XP_029985695.1      |
| actin, cytoplasmic [Cheilinus undulatus]                                   | <i>Cheilinus undulatus</i>      | 100% | 97.05%        | XP_041642816.1      |
| PREDICTED: actin, cytoplasmic 1-like [Poecilia reticulata]                 | <i>Poecilia reticulata</i>      | 100% | 97.05%        | XP_008417682.1      |
| beta-actin [Meretrix meretrix]                                             | <i>Meretrix meretrix</i>        | 100% | 97.05%        | AEK81538.1          |
| hypothetical protein BaRGS_009048 [ <b>Batillaria attramentaria</b> ]      | <b>Batillaria attramentaria</b> | 100% | <b>97.05%</b> | <b>KAG5710332.1</b> |
| beta actin [Exaiptasia diaphana]                                           | <i>Exaiptasia diaphana</i>      | 100% | 97.05%        | AAQ62633.1          |
| actin-like protein [Stylophora pistillata]                                 | <i>Stylophora pistillata</i>    | 100% | 97.05%        | AGG36337.1          |
| actin, cytoplasmic [Patiria miniata]                                       | <i>Patiria miniata</i>          | 100% | 97.05%        | XP_038044475.1      |
| actin, cytoplasmic isoform X1 [Stylophora pistillata]                      | <i>Stylophora pistillata</i>    | 100% | 97.05%        | XP_022795459.1      |
| Actin, cytoplasmic [Stylophora pistillata]                                 | <i>Stylophora pistillata</i>    | 100% | 97.05%        | PFX22595.1          |
| actin, cytoplasmic [Sebastes umbrosus]                                     | <i>Sebastes umbrosus</i>        | 100% | 97.05%        | XP_037633840.1      |
| actin, non-muscle 6.2 [Salaria fasciatus]                                  | <i>Salaria fasciatus</i>        | 100% | 97.05%        | XP_029961458.1      |
| unnamed protein product [Darwinula stevensoni]                             | <i>Darwinula stevensoni</i>     | 100% | 97.05%        | CAD7248021.1        |
| beta-actin [ <b>Cepaea nemoralis</b> ]                                     | <b>Cepaea nemoralis</b>         | 100% | <b>97.05%</b> | <b>AXI69344.1</b>   |
| Oidioi.mRNA.OKI2018_I69.PAR.g11455.t1.cds [Oikopleura dioica]              | <i>Oikopleura dioica</i>        | 100% | 97.05%        | CAG5087094.1        |

|                                                                                          |                                        |      |               |                       |
|------------------------------------------------------------------------------------------|----------------------------------------|------|---------------|-----------------------|
| unnamed protein product [Oikopleura dioica]                                              | <i>Oikopleura dioica</i>               | 100% | 97.05%        | CBY24839.1            |
| actin [ <b>Plakobranthus ocellatus</b> ]                                                 | <b><i>Plakobranthus ocellatus</i></b>  | 100% | <b>97.05%</b> | <b>GFN80142.1</b>     |
| Actin, cytoplasmic, intermediate form; [ <b>Biomphalaria alexandrina</b> ]               | <b><i>Biomphalaria alexandrina</i></b> | 100% | <b>96.68%</b> | <b>Q964E3.1</b>       |
| beta-actin [Nothobranchius furzeri]                                                      | <i>Nothobranchius furzeri</i>          | 100% | 96.68%        | ABR86936.1            |
| actin, cytoplasmic 1 [Oreochromis niloticus]                                             | <i>Oreochromis niloticus</i>           | 100% | 96.68%        | XP_003444532.1        |
| actin, cytoplasmic [Oryzias latipes]                                                     | <i>Oryzias latipes</i>                 | 100% | 96.68%        | XP_011477986.1        |
| actin [Cerebratulus lacteus]                                                             | <i>Cerebratulus lacteus</i>            | 100% | 96.68%        | ANC90245.1            |
| non-muscle actin 6.2 [Malo kingi]                                                        | <i>Malo kingi</i>                      | 100% | 96.68%        | ACY74447.1            |
| PREDICTED: actin, cytoplasmic 1-like [Nothobranchius furzeri]                            | <i>Nothobranchius furzeri</i>          | 100% | 96.68%        | XP_015815812.1        |
| Actin, cytoplasmic, intermediate form; Flags: Precursor [ <b>Planorbella trivolvis</b> ] | <b><i>Planorbella trivolvis</i></b>    | 100% | <b>96.68%</b> | <b>Q964D9.1</b>       |
| beta-actin isotype 1 [ <b>Lymnaea stagnalis</b> ]                                        | <b><i>Lymnaea stagnalis</i></b>        | 100% | <b>96.68%</b> | <b>AOV18885.1</b>     |
| Actin, cytoplasmic, intermediate form; Flags: Precursor [ <b>Biomphalaria glabrata</b> ] | <b><i>Biomphalaria glabrata</i></b>    | 100% | <b>96.68%</b> | <b>P92179.2</b>       |
| hypothetical protein LOTGIDRAFT_205506 [ <b>Lottia gigantea</b> ]                        | <b><i>Lottia gigantea</i></b>          | 100% | <b>96.68%</b> | <b>XP_009065998.1</b> |
| hypothetical protein CCH79_00016215 [Gambusia affinis]                                   | <i>Gambusia affinis</i>                | 100% | 96.68%        | PWA24173.1            |
| hypothetical protein OJAV_G00095600 [Oryzias javanicus]                                  | <i>Oryzias javanicus</i>               | 100% | 96.68%        | RVE68811.1            |

Gastropoda shown in bold.

**Table S9.** NCBI BLAST result for *Aplysia californica* actin nucleotide sequence.

| Description                                                                   | Scientific Name                     | Query Cover | Per. Ident    |
|-------------------------------------------------------------------------------|-------------------------------------|-------------|---------------|
| <b>Aplysia californica</b> actin (LOC100533345), mRNA                         | <b><i>Aplysia californica</i></b>   | 100%        | <b>100.0%</b> |
| PREDICTED: <b>Aplysia californica</b> actin, cytoplasmic (LOC106013368), mRNA | <b><i>Aplysia californica</i></b>   | 100%        | <b>96.4%</b>  |
| <b>Littorina littorea</b> actin (Act1) mRNA, complete cds                     | <b><i>Littorina littorea</i></b>    | 100%        | <b>88.9%</b>  |
| PREDICTED: Megalops cyprinoides actin, beta 2 (actb2), mRNA                   | <i>Megalops cyprinoides</i>         | 100%        | 88.3%         |
| PREDICTED: Acipenser ruthenus actin, beta 1 (actb1), mRNA                     | <i>Acipenser ruthenus</i>           | 100%        | 88.3%         |
| <b>Rapana venosa</b> actin (Act1) mRNA, complete cds                          | <b><i>Rapana venosa</i></b>         | 100%        | <b>88.3%</b>  |
| Acipenser dabryanus beta actin mRNA, partial cds                              | <i>Acipenser dabryanus</i>          | 100%        | 88.0%         |
| <b>Haliotis midae</b> clone Hdd.c148 microsatellite sequence                  | <b><i>Haliotis midae</i></b>        | 100%        | <b>88.0%</b>  |
| <b>Haliotis diversicolor</b> clone HDr4CJ470 beta-actin 2 mRNA, complete cds  | <b><i>Haliotis diversicolor</i></b> | 100%        | <b>88.0%</b>  |
| PREDICTED: Acipenser ruthenus actin, cytoplasmic 2 (LOC117418240), mRNA       | <i>Acipenser ruthenus</i>           | 100%        | 87.9%         |
| PREDICTED: Pangasianodon hypophthalmus actin, beta 2 (actb2), mRNA            | <i>Pangasianodon hypophthalmus</i>  | 100%        | 87.9%         |
| Danio rerio actin, beta 2 (actb2), mRNA                                       | <i>Danio rerio</i>                  | 100%        | 87.9%         |
| Danio rerio bactin2, mRNA (cDNA clone MGC:172104 IMAGE:7912932), complete cds | <i>Danio rerio</i>                  | 100%        | 87.9%         |

PREDICTED: *Esox lucius* actin, beta 2 (actb2), mRNA  
PREDICTED: *Cyprinus carpio* actin, cytoplasmic 1 (LOC109051881), mRNA  
*Spinibarbus denticulatus* beta-actin mRNA, complete cds  
*Danio rerio* bactin2, mRNA (cDNA clone MGC:85665 IMAGE:6960309), complete cds  
*Danio rerio* beta actin mRNA, complete cds  
***Haliotis diversicolor*** actin mRNA, complete cds  
PREDICTED: ***Biomphalaria glabrata*** actin, adductor muscle (LOC106058166), mRNA  
***Haliotis tuberculata*** mRNA for actin (actin gene) from haemocyte cells  
*Urechis unicinctus* beta-actin mRNA, complete cds  
PREDICTED: *Esox lucius* actin, beta 1 (actb1), mRNA  
*Acipenser dabryanus* beta-actin mRNA, complete cds  
*Carassius auratus* B-actin mRNA for beta-actin, complete cds  
*Danio rerio* bactin2, mRNA (cDNA clone MGC:192911 IMAGE:100061397), complete cds  
*Danio rerio* bactin2, mRNA (cDNA clone MGC:56040 IMAGE:3820122), complete cds  
*Danio rerio* beta-actin mRNA, complete cds  
*Morulus calbasu* beta-actin mRNA, complete cds  
*Danio rerio* actin, beta 1 (actb1), mRNA  
PREDICTED: *Cyprinus carpio* actin, cytoplasmic 1 (LOC109073280), transcript variant X2, mRNA  
PREDICTED: *Cyprinus carpio* actin, cytoplasmic 1 (LOC109073280), transcript variant X1, mRNA  
*Sinocyclocheilus anshuiensis* actin, cytoplasmic 1 (LOC107692666), mRNA  
*Sinocyclocheilus anshuiensis* actin, cytoplasmic 1-like (LOC107702535), transcript variant X2, mRNA  
*Sinocyclocheilus anshuiensis* actin, cytoplasmic 1-like (LOC107702535), transcript variant X1, mRNA  
*Danio rerio* bactin1, mRNA (cDNA clone MGC:77623 IMAGE:6996683), complete cds  
***Aplysia californica*** actin, muscle (LOC100533357), mRNA  
*Placopecten magellanicus* actin mRNA, complete cds  
PREDICTED: *Anguilla anguilla* actin, cytoplasmic 2 (LOC118216518), mRNA  
PREDICTED: *Sinocyclocheilus anshuiensis* actin, cytoplasmic 1 (LOC107703420), mRNA  
*Crassostrea gigas* genome assembly, linkage group: LG7  
PREDICTED: *Carassius auratus* actin, cytoplasmic 1 (LOC113044540), mRNA  
PREDICTED: *Sinocyclocheilus rhinoceros* actin, cytoplasmic 1 (LOC107725373), mRNA  
PREDICTED: *Sinocyclocheilus rhinoceros* actin, cytoplasmic 1 (LOC107722944), mRNA  
PREDICTED: *Cyprinodon variegatus* actin, beta (actb), mRNA  
*Rhodeus uyekii* beta-actin mRNA, complete cds  
*Onychostoma macrolepis* beta-actin mRNA, complete cds

|                                     |      |              |
|-------------------------------------|------|--------------|
| <i>Esox lucius</i>                  | 100% | 87.8%        |
| <i>Cyprinus carpio</i>              | 100% | 87.8%        |
| <i>Spinibarbus denticulatus</i>     | 100% | 87.8%        |
| <i>Danio rerio</i>                  | 100% | 87.8%        |
| <i>Danio rerio</i>                  | 100% | 87.8%        |
| <b><i>Haliotis diversicolor</i></b> | 100% | <b>87.8%</b> |
| <b><i>Biomphalaria glabrata</i></b> | 99%  | <b>87.7%</b> |
| <b><i>Haliotis tuberculata</i></b>  | 100% | <b>87.6%</b> |
| <i>Urechis unicinctus</i>           | 100% | 87.6%        |
| <i>Esox lucius</i>                  | 100% | 87.5%        |
| <i>Acipenser dabryanus</i>          | 100% | 87.5%        |
| <i>Carassius auratus</i>            | 100% | 87.5%        |
| <i>Danio rerio</i>                  | 100% | 87.5%        |
| <i>Danio rerio</i>                  | 100% | 87.5%        |
| <i>Danio rerio</i>                  | 100% | 87.5%        |
| <i>Labeo calbasu</i>                | 100% | 87.4%        |
| <i>Danio rerio</i>                  | 100% | 87.4%        |
| <i>Cyprinus carpio</i>              | 100% | 87.4%        |
| <i>Cyprinus carpio</i>              | 100% | 87.4%        |
| <i>Sinocyclocheilus anshuiensis</i> | 100% | 87.4%        |
| <i>Sinocyclocheilus anshuiensis</i> | 100% | 87.4%        |
| <i>Sinocyclocheilus anshuiensis</i> | 100% | 87.4%        |
| <i>Danio rerio</i>                  | 100% | 87.4%        |
| <b><i>Aplysia californica</i></b>   | 100% | <b>87.4%</b> |
| <i>Placopecten magellanicus</i>     | 100% | 87.3%        |
| <i>Anguilla anguilla</i>            | 100% | 87.2%        |
| <i>Sinocyclocheilus anshuiensis</i> | 100% | 87.2%        |
| <i>Crassostrea gigas</i>            | 99%  | 87.2%        |
| <i>Carassius auratus</i>            | 100% | 87.1%        |
| <i>Sinocyclocheilus rhinoceros</i>  | 100% | 87.1%        |
| <i>Sinocyclocheilus rhinoceros</i>  | 100% | 87.1%        |
| <i>Cyprinodon variegatus</i>        | 100% | 87.1%        |
| <i>Rhodeus uyekii</i>               | 100% | 87.1%        |
| <i>Onychostoma macrolepis</i>       | 100% | 87.1%        |

|                                                                                            |                                    |      |              |
|--------------------------------------------------------------------------------------------|------------------------------------|------|--------------|
| PREDICTED: Colossoma macropomum actin, beta 1 (actb1), mRNA                                | <i>Colossoma macropomum</i>        | 100% | 87.1%        |
| Danio rerio bactin1, mRNA (cDNA clone MGC:192419 IMAGE:100060865), complete cds            | <i>Danio rerio</i>                 | 100% | 87.1%        |
| Danio rerio bactin1, mRNA (cDNA clone MGC:55989 IMAGE:3819668), complete cds               | <i>Danio rerio</i>                 | 100% | 87.1%        |
| PREDICTED: Pangasianodon hypophthalmus actin, beta 1 (actb1), transcript variant X2, mRNA  | <i>Pangasianodon hypophthalmus</i> | 100% | 87.1%        |
| PREDICTED: Pangasianodon hypophthalmus actin, beta 1 (actb1), transcript variant X1, mRNA  | <i>Pangasianodon hypophthalmus</i> | 100% | 87.1%        |
| PREDICTED: <b>Pomacea canaliculata</b> actin, adductor muscle (LOC112575079), mRNA         | <b><i>Pomacea canaliculata</i></b> | 99%  | <b>87.1%</b> |
| PREDICTED: Merops nubicus actin, cytoplasmic 1 (LOC103775609), transcript variant X5, mRNA | <i>Merops nubicus</i>              | 99%  | 87.1%        |
| PREDICTED: Merops nubicus actin, cytoplasmic 1 (LOC103775609), transcript variant X1, mRNA | <i>Merops nubicus</i>              | 99%  | 87.1%        |

Gastropoda shown in bold.

**Table S10.** NCBI BLAST results for *Aplysia californica* actin amino acid sequence.

| Description                                                               | Scientific Name                 | Query Cover | Per. Ident    |
|---------------------------------------------------------------------------|---------------------------------|-------------|---------------|
| actin [ <b>Aplysia californica</b> ]                                      | <i>Aplysia californica</i>      | 100%        | <b>100.0%</b> |
| actin, cytoplasmic [ <b>Aplysia californica</b> ]                         | <i>Aplysia californica</i>      | 100%        | <b>98.1%</b>  |
| actin [ <b>Littorina littorea</b> ]                                       | <i>Littorina littorea</i>       | 100%        | <b>97.8%</b>  |
| actin, cytoplasmic [ <b>Pomacea canaliculata</b> ]                        | <i>Pomacea canaliculata</i>     | 100%        | <b>97.8%</b>  |
| actin, cytoplasmic [Octopus sinensis]                                     | <i>Octopus sinensis</i>         | 100%        | 97.8%         |
| Actin, cytoplasmic, intermediate form [ <b>Biomphalaria tenagophila</b> ] | <i>Biomphalaria tenagophila</i> | 100%        | <b>97.4%</b>  |
| Actin, cytoplasmic, intermediate form [ <b>Biomphalaria obstructa</b> ]   | <i>Biomphalaria obstructa</i>   | 100%        | <b>97.4%</b>  |
| actin [ <b>Rapana venosa</b> ]                                            | <i>Rapana venosa</i>            | 100%        | <b>97.4%</b>  |
| Actin, cytoplasmic, intermediate form [ <b>Biomphalaria pfeifferi</b> ]   | <i>Biomphalaria pfeifferi</i>   | 100%        | <b>97.4%</b>  |
| beta-actin isotype 2 [ <b>Lymnaea stagnalis</b> ]                         | <i>Lymnaea stagnalis</i>        | 100%        | <b>97.4%</b>  |
| hypothetical protein LOTGIDRAFT_227913 [Lottia gigantea]                  | <i>Lottia gigantea</i>          | 100%        | 97.4%         |
| actin, cytoplasmic isoform X1 [Lingula anatina]                           | <i>Lingula anatina</i>          | 100%        | 97.4%         |
| Actin, cytoplasmic, intermediate form [ <b>Biomphalaria alexandrina</b> ] | <i>Biomphalaria alexandrina</i> | 100%        | <b>97.0%</b>  |
| actin, cytoplasmic-like [Actinia tenebrosa]                               | <i>Actinia tenebrosa</i>        | 100%        | 97.0%         |
| Actin, cytoplasmic, intermediate form [ <b>Planorbella trivolvis</b> ]    | <i>Planorbella trivolvis</i>    | 100%        | <b>97.0%</b>  |
| actin, cytoplasmic [Orbicella faveolata]                                  | <i>Orbicella faveolata</i>      | 100%        | 97.0%         |
| cytoplasmic actin [Dreissena polymorpha]                                  | <i>Dreissena polymorpha</i>     | 100%        | 97.0%         |
| actin [Diplodon chilensis]                                                | <i>Diplodon chilensis</i>       | 100%        | 97.0%         |
| PREDICTED: actin, cytoplasmic [Octopus bimaculoides]                      | <i>Octopus bimaculoides</i>     | 100%        | 97.0%         |
| cytoplasmic actin [Pinctada fucata]                                       | <i>Pinctada fucata</i>          | 100%        | 97.0%         |
| beta-actin [ <b>Cepaea nemoralis</b> ]                                    | <i>Cepaea nemoralis</i>         | 100%        | <b>97.0%</b>  |
| actin, cytoplasmic 1 [Nematostella vectensis]                             | <i>Nematostella vectensis</i>   | 100%        | 96.7%         |

|                                                                        |                                     |      |              |
|------------------------------------------------------------------------|-------------------------------------|------|--------------|
| actin, cytoplasmic [Asterias rubens]                                   | <i>Asterias rubens</i>              | 100% | 96.7%        |
| act protein isoform X1 [Ciona intestinalis]                            | <i>Ciona intestinalis</i>           | 100% | 96.7%        |
| hypothetical protein LOTGIDRAFT_205506 [Lottia gigantea]               | <i>Lottia gigantea</i>              | 100% | 96.7%        |
| actin, cytoplasmic [Nematostella vectensis]                            | <i>Nematostella vectensis</i>       | 100% | 96.7%        |
| actin, cytoplasmic 1 [Nematostella vectensis]                          | <i>Nematostella vectensis</i>       | 100% | 96.7%        |
| beta-actin isotype 1 [ <b>Lymnaea stagnalis</b> ]                      | <b><i>Lymnaea stagnalis</i></b>     | 100% | <b>96.7%</b> |
| Actin, cytoplasmic, intermediate form [ <b>Biomphalaria glabrata</b> ] | <b><i>Biomphalaria glabrata</i></b> | 100% | <b>96.7%</b> |
| beta-actin [Sinanodonta woodiana]                                      | <i>Sinanodonta woodiana</i>         | 100% | 96.7%        |
| beta-actin [Meretrix meretrix]                                         | <i>Meretrix meretrix</i>            | 100% | 96.7%        |
| actin-2 [Nematostella vectensis]                                       | <i>Nematostella vectensis</i>       | 100% | 96.7%        |
| actin beta/gamma 1 [Paragonimus westermani]                            | <i>Paragonimus westermani</i>       | 100% | 96.7%        |
| Actin, cytoplasmic [Stylophora pistillata]                             | <i>Stylophora pistillata</i>        | 100% | 96.7%        |
| actin-like protein [Stylophora pistillata]                             | <i>Stylophora pistillata</i>        | 100% | 96.7%        |
| actin, cytoplasmic isoform X1 [Stylophora pistillata]                  | <i>Stylophora pistillata</i>        | 100% | 96.7%        |
| beta actin [Doryteuthis pealeii]                                       | <i>Doryteuthis pealeii</i>          | 100% | 96.7%        |
| Actin-2 isoform 1 [Schistosoma japonicum]                              | <i>Schistosoma japonicum</i>        | 100% | 96.7%        |
| PREDICTED: actin, cytoplasmic [Pundamilia nyererei]                    | <i>Pundamilia nyererei</i>          | 100% | 96.3%        |
| actin, cytoplasmic 2-like [Petromyzon marinus]                         | <i>Petromyzon marinus</i>           | 100% | 96.3%        |
| actin, cytoplasmic 1-like [Sphaeramia orbicularis]                     | <i>Sphaeramia orbicularis</i>       | 100% | 96.3%        |
| hypothetical protein LDENG_00240370 [Lucifuga dentata]                 | <i>Lucifuga dentata</i>             | 100% | 96.3%        |
| hypothetical protein LOTGIDRAFT_202971 [Lottia gigantea]               | <i>Lottia gigantea</i>              | 100% | 96.3%        |
| predicted protein [Nematostella vectensis]                             | <i>Nematostella vectensis</i>       | 100% | 96.3%        |
| PREDICTED: actin, cytoplasmic [Acropora digitifera]                    | <i>Acropora digitifera</i>          | 100% | 96.3%        |
| PREDICTED: actin, cytoplasmic 1-like [Poecilia formosa]                | <i>Poecilia formosa</i>             | 100% | 96.3%        |
| actin, cytoplasmic-like [Monopterus albus]                             | <i>Monopterus albus</i>             | 100% | 96.3%        |
| actin [Galaxea fascicularis]                                           | <i>Galaxea fascicularis</i>         | 100% | 96.3%        |
| actin, cytoplasmic 1 [Oreochromis niloticus]                           | <i>Oreochromis niloticus</i>        | 100% | 95.9%        |
| actin, cytoplasmic [Oryzias latipes]                                   | <i>Oryzias latipes</i>              | 100% | 95.9%        |
| PREDICTED: actin, cytoplasmic 1-like [Nothobranchius furzeri]          | <i>Nothobranchius furzeri</i>       | 100% | 95.9%        |
| beta-actin [Nothobranchius furzeri]                                    | <i>Nothobranchius furzeri</i>       | 100% | 95.9%        |
| actin, cytoplasmic 2 [Oryzias melastigma]                              | <i>Oryzias melastigma</i>           | 100% | 95.9%        |
| actin [Cerebratulus lacteus]                                           | <i>Cerebratulus lacteus</i>         | 100% | 95.9%        |
| PREDICTED: actin, cytoplasmic 1-like [Poecilia reticulata]             | <i>Poecilia reticulata</i>          | 100% | 95.9%        |

Gastropoda shown in bold.

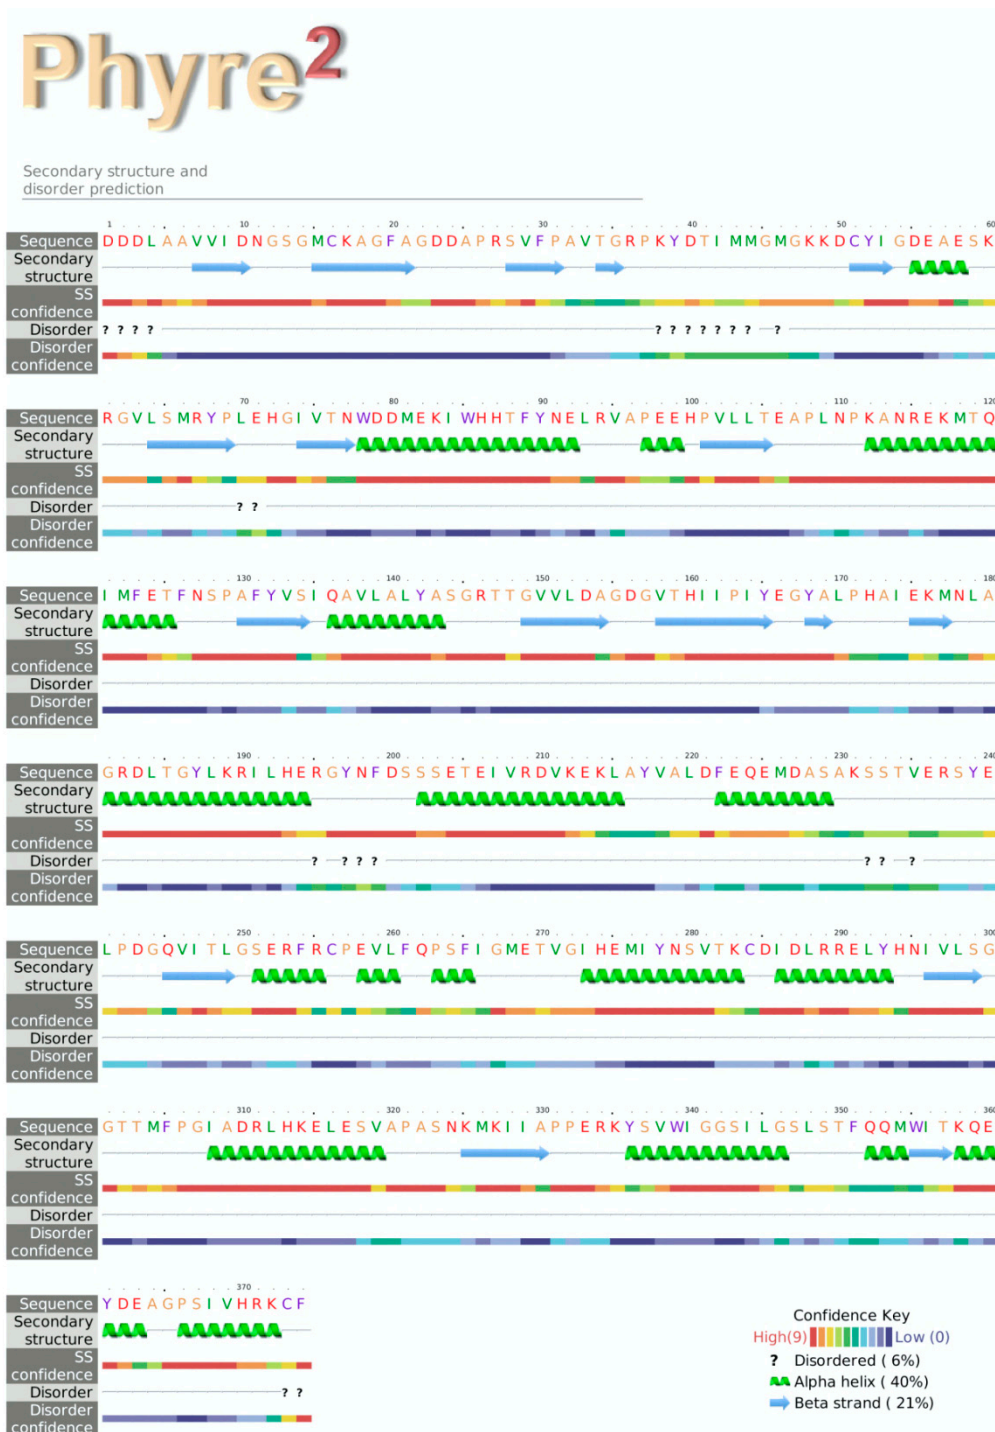

**Figure S9.** Phyre2 prediction of secondary structure and disorder of the in silico *Chromodoris/Armina*-actin-hybrid-model.
